1 **Short title:** Gene expression in cowpea reproductive cell-types.

2

3 **Author for Contact:** Anna M.G. Koltunow

4

5 **Article title:**

6 Gene expression in isolated cowpea (*Vigna unguiculata* L. Walp) cells from meiosis to seed

7 initiation

8 **Author names and affiliations:**

9 Nial Gursansky<sup>1</sup>, Danielle Mazurkiewicz<sup>1</sup>, Martina Juranić<sup>1</sup>, Susan D. Johnson<sup>1</sup>, Gloria León<sup>2</sup>,  
10 Rocio Escobar-Guzmán<sup>2</sup>, Rigel Salinas-Gamboa<sup>2</sup>, Itzel Amasende-Morales<sup>2</sup>, Matteo Riboni<sup>1</sup>,  
11 Melanie Hand<sup>1</sup>, Andrew Spriggs<sup>3</sup>, Jean-Philippe Vielle-Calzada<sup>2</sup> and Anna M.G. Koltunow<sup>1,4</sup>

12 1: Commonwealth Scientific and Industrial Research Organisation (CSIRO) Agriculture and  
13 Food, Waite Campus, Urrbrae, South Australia 5064, Australia

14 2: Group of Reproductive Development and Apomixis, UGA Laboratorio Nacional de  
15 Genómica para la Biodiversidad, CINVESTAV Irapuato, Guanajuato 36821, México.

16 3: CSIRO Agriculture and Food, Black Mountain Science and Innovation Park, Canberra, ACT  
17 2601, Australia.

18

19 **Author Contributions:**

20 D.M. isolated LCM cell types, and obtained transcriptomes; N.G. conducted data analyses  
21 identifying expression profiles and developmental trends; M.J. and S.D.J. contributed to cell  
22 cycle and transgenic cowpea analyses; G.L., R.E-G and R.S-G. performed *in situ*  
23 hybridizations; M.R. verified gene expression by qRT-PCR; M.H. prepared constructs; I.A-M.

24 carried out promoter characterization in *Arabidopsis*; A.S. assembled transcriptomes,  
25 carried out global alignments of RNA-seq to genomic sequences ; J-P.V-C. and A.M.G.K.  
26 designed experiments and analyzed data. N.G., J-P.V-C. and A.M.G.K wrote the paper.  
27 A.M.G.K. agrees to serve as the author responsible for contact and ensures communication.

28

29 **Funding information:** This work was funded by a grant from the Bill and Melinda Gates  
30 foundation to the Commonwealth Scientific and Industrial Research Organisation (CSIRO)  
31 (OPP1076280).

32

33 **Present address:**

34 <sup>4</sup>. Queensland Alliance for Agriculture and Food Innovation (QAAFI) Centre for Crop Science.  
35 The University of Queensland. St Lucia. Queensland 4072. Australia.

36

37 **Email address of author for contact:** [a.koltunow@uq.edu.au](mailto:a.koltunow@uq.edu.au)

38

39 **One sentence summary**

40 Analyses of laser capture derived cell-type transcriptomes spanning meiosis to seed  
41 initiation revealed gene expression profiles during cell specification and reproductive  
42 development in cowpea.

43 **Abstract**

44 Molecular knowledge of pathways regulating seed formation in legumes, remains scarce.  
45 Thirteen isolated cell-type transcriptomes were developed, spanning temporal events of  
46 male and female gametogenesis and seed initiation, to examine pathways involved in

47 cowpea seed formation. *In situ* hybridization confirmed localization of *in silico* identified  
48 cell-specific genes, verifying transcriptome utility. Cowpea and *Arabidopsis* reproductive  
49 cells showed some conservation in regulators enabling cell-type expression as some cowpea  
50 cell-specific genes promoters and their *Arabidopsis* homologs directed expression to  
51 identical reproductive cell-types in transgenic plants. *In silico* analyses revealed gene  
52 expression similarities and differences with genes in pathways regulating reproductive  
53 events in other plants. Meiosis-related genes were expressed at mitotic stages of  
54 gametogenesis and during sporophytic development in cowpea. Plant hormone pathways  
55 showing preferential expression at particular reproductive stages were identified.  
56 Expression of epigenetic pathways, resembling those found in *Arabidopsis*, including  
57 microRNA mediated gene silencing, RNA directed DNA methylation and histone  
58 modification were associated with particular stages of male and female gametophyte  
59 development, suggesting roles in gametogenic cell specification and elaboration. Analyses of  
60 cell-cycle related gene expression in mature cowpea female gametophytes, indicated that  
61 the egg and central cell were arrested at the G1/S and G2/M cell cycle phases, respectively,  
62 prior to fertilization. Pre-fertilization female gametophyte arrest was characterized by  
63 barely detectable auxin biosynthesis gene expression levels, and elevated expression of  
64 genes involved in RNA-mediated gene silencing and histone modification. These  
65 transcriptomes provide a useful resource for additional interrogation to support functional  
66 analyses for development of higher yielding cowpea and syntenic legume crops.

## 67 **Introduction**

68 Legumes contribute directly and indirectly to world food supply. Higher in protein, they  
69 provide forage for animals and increase soil fertility by fixing nitrogen. Agronomic

70 improvement of eight grain legumes, including cowpea (*Vigna unguiculata* L. Walp) has  
71 been targeted by the Consultative Group for International Agricultural Research  
72 ([https://storage.googleapis.com/cgiarorg/2018/11/SC7-B\\_Breeding-Initiative-1.pdf](https://storage.googleapis.com/cgiarorg/2018/11/SC7-B_Breeding-Initiative-1.pdf)). We  
73 aim to increase seed yield and quality in cowpea, which originated in Africa and remains an  
74 important subsistence crop in sub-Saharan Africa (Singh, 2014). Although cowpea is  
75 relatively tolerant to drought, it is prone to high levels of flower and pod drop, resulting in  
76 decreased seed yields. There is limited knowledge of the molecular pathways supporting  
77 successful elaboration of cowpea male and female gametophytes and seeds.

78

79 Current genomic resources for cowpea include a reference genome (Lonardi et al., 2019,  
80 Munoz-Amatriain et al., 2017) together with survey genomes and transcriptomes from  
81 various plant tissues (Spriggs et al., 2018, Yao et al., 2016). Reproductive events occur only  
82 in a few cell-types buried within cowpea floral organs (Salinas-Gamboa et al., 2016).  
83 Therefore, laser capture microdissection (LCM) is a useful approach to isolate reproductive  
84 cell-types to generate informative transcriptomes. Interrogation of these reproductive cell-  
85 type transcriptomes in conjunction with cowpea genome and tissue transcriptome  
86 resources could accelerate identification and functional examination of pathways  
87 supporting successful cowpea seed formation.

88

89 A cowpea reproductive calendar has been developed linking morphological floral features in  
90 cowpea to reproductive events in floral tissues to support collection of tissues for molecular  
91 analyses (Salinas-Gamboa et al., 2016). Male gametophyte precursor cells, termed pollen  
92 mother cells (PMC) undergo meiosis (sporogenesis) forming tetrads of microspores (mTET)  
93 in the anther. Individual microspores (MIC) then undergo mitosis (microgametogenesis) and

94 differentiation to form the mature pollen grain (MP-SC) containing a generative and a  
95 vegetative cell (Fig. 1A). By contrast, during female gametophyte development, a single  
96 megaspore mother cell (MMC) in each ovule undergoes meiosis to form a tetrad of  
97 megaspores (fTET). Three megaspores degenerate and the surviving functional megaspore  
98 (FM) undergoes three rounds of mitosis to form a syncytium of eight nuclei  
99 (megagametogenesis). Cellularization events result in a 7-celled *Polygonum*-type female  
100 gametophyte, or embryo sac, and three of these degrade. The mature cowpea embryo sac  
101 (MES) contains an egg cell (EC) progenitor of the embryo (Em), flanked by two synergids  
102 (Sy), which guide fertilization events and the central cell (CC) containing two fused haploid  
103 nuclei, which is the progenitor of the endosperm (En; Fig. 1A; Salinas-Gamboa et al., 2016).

104

105 The events of fertilization initiate with pollen grain germination and emergence of the  
106 pollen tube on the stigma. We have observed that mitosis of the generative cell to form the  
107 two sperm cells predominantly occurs after pollen tube germination (see Results). Pollen  
108 tube growth through maternal tissues into the ovule, synergid puncture and pollen tube  
109 burst releases both sperm cells into the embryo sac. One sperm cell fuses with the egg to  
110 initiate embryogenesis and the other fuses with with the polar nucleus of the central cell to  
111 produce the triploid endosperm. Endosperm tissue is transient in cowpea as it is utilized  
112 during embryo development (Salinas-Gamboa et al., 2016); Fig. 1A).

113

114 Studies in *Arabidopsis*, rice, maize, *Boechera* and *Hieracium* have used LCM to isolate cells  
115 involved in sexual and asexual (apomictic) reproductive events to examine cell-type specific  
116 gene expression (Anderson et al., 2013, Kubo et al., 2013, Zhan et al., 2015, Belmonte et al.,  
117 2013, Okada et al., 2013). These analyses have typically focused on the expression in cells

118 involved in specific aspects of the reproductive pathway due to the biological questions  
119 being addressed, and potentially, the laborious nature of the method. To our knowledge, a  
120 transcriptome series spanning reproductive events in isolated cells from the initiation of  
121 meiosis to seed initiation has not been generated in a species. This would enable direct  
122 comparisons of gene expression during male and female gametogenesis and seed  
123 development within the plant and also with pathways known to functionally regulate cell  
124 specification and reproductive development in other plants.

125

126 Here, we used LCM and additional tissue isolation procedures, to develop a suite of 13  
127 cowpea reproductive cell-type transcriptomes spanning the temporal events of male and  
128 female gametophyte development, and early seed initiation in cowpea. *In vitro* and *in*  
129 *planta* analyses were used to verify transcriptome integrity. Following an analysis of global  
130 gene expression profiles across the transcriptome set, an *in silico* analysis of the expression  
131 of genes involved in epigenetic regulation, hormone biosynthesis and signal transduction,  
132 and cell cycle progression was undertaken as these pathways regulate reproductive aspects  
133 in other angiosperms. These analyses revealed commonalities between cowpea and other  
134 species with respect to some of these pathways, in addition to novel cowpea-related  
135 differences identifying genes and pathways as candidates for future functional testing.

## 136 **Results**

### 137 **Cowpea IT86D-1010 leaf and reproductive cell-type transcriptomes and PCR verifications**

138 A total of 13 reproductive transcriptomes were generated, in duplicate, using RNA extracted  
139 from individual reproductive cells that span male and female gametogenesis, and early seed  
140 initiation. Laser capture microdissection was used to generate 12 reproductive cell-type

141 transcriptomes, while pollen and sperm cells were sampled separately (see below, Fig. 1A).  
142 Female gametophyte-related cell-type transcriptomes were generated for the megaspore  
143 mother cell (MMC) during meiosis I, the tetrad of post-meiotic megaspores (fTET),  
144 developing mitotic embryo sacs with two or four nuclei (ES2n, ES4n), and the mature  
145 embryo sac (MES) containing the egg cell (EC), the flanking synergids (Sy), and the central  
146 cell (CC), at the time of stamen emergence (anthesis). Individual EC and CC transcriptomes  
147 were also made. The early embryo (Em) transcriptome comprised tissue from developing  
148 zygotes to early globular stages of cowpea embryogenesis (Fig 1A).

149

150 Male gametophyte-related transcriptomes were generated for pollen mother cells at early  
151 and later stages of meiosis I (PMC.E, PMC.L), microspore tetrads (mTET), and uninucleate  
152 microspores (MIC). A pure sperm cell transcriptome was not generated. Analyses of cleared  
153 anthers indicated that 9.7% of mature pollen grains contained two sperm cells (n=500),  
154 indicating the final generative cell mitosis giving rise to the sperm cells primarily occurs  
155 following pollen tube germination. This is also observed in soybean and 70% of flowering  
156 plant species (Brewbaker, 1967, Williams et al., 2014, Haerizadeh et al., 2009,  
157 Wojciechowski et al., 2004). Anthers and pistils harvested at anthesis were processed to  
158 create a transcriptome referred to as mature pollen-sperm cell (MP-SC; see Methods for  
159 details). An additional transcriptome generated from young expanding cowpea leaves  
160 served as a control comparison for gene expression in cells not undergoing reproductive  
161 events.

162

163 A total of 74,839 genes were predicted in the IT86D-1010 genome (Spriggs et al., 2018)  
164 using Augustus gene prediction software when *Arabidopsis* genes were used as the training

165 data set (Supplemental Data 1). Transcriptome sequences were aligned with the predicted  
166 genes in the IT86D-1010 cowpea genome to identify common and uniquely expressed genes  
167 across all datasets (Supplemental Table 1, Supplemental Data 2). The total number of  
168 uniquely expressed genes within each transcriptome ranged from 22,561 in the female  
169 megaspore tetrad (fTET) to 60,359 in the MP-SC sample (Fig. 1B). Only 3,769 of the genes  
170 expressed in the MP-SC transcriptome were not detected in at least one other cell-type. As  
171 a likely consequence of its isolation method, the high transcript diversity in the MP-SC  
172 transcriptome contrasts with that found in pollen and sperm cell transcriptomes of  
173 *Arabidopsis*, rice and maize, where the number of genes detected is reduced compared to  
174 sporophytic cell-types (Rutley and Twell, 2015).

175

176 Gene expression across all of the transcriptomes was normalized using reads per million  
177 (RPM) given the absence of a correlation between gene length and read alignment number.  
178 Investigation of unique gene expression levels within each transcriptome indicated that the  
179 majority of unique genes (68-85%) were expressed at very low to moderate levels (<1 to 5-  
180 20 RPM; Fig 1C). Principal component analysis (PCA) using the individual transcriptome  
181 replicates showed that most replicates clustered together. The transcriptomes from male  
182 and female reproductive cell-types co-segregated forming two distinct male and female  
183 clusters. The embryo transcriptomes associated with the female reproductive transcriptome  
184 cluster, while the leaf and MP-SC transcriptomes were outliers (Supplemental Fig.2).

185

186 The quality of the generated transcriptomes was evaluated by examining if cell-type specific  
187 genes could be identified via *in silico* methods in the transcriptomes, and then by verifying  
188 gene expression by qRT-PCR, *in situ* and transgenic approaches. Candidate cell-type specific



189 genes were initially identified using rsgcc software in the MMC, PMC, EN2n, En4n, MES, CC,  
190 ES, Em and sperm transcriptomes (Fig. 1A). Candidate genes identified ranged in number  
191 from 126 in early pollen mother cells to 25,986 in the MP-SC transcriptome (Supplemental  
192 Data 3 and 4). A filtering approach based on identification of genes expressed at least five  
193 times higher in the CC, EC or MP-SC transcriptomes relative to all others resulted in 10, 34  
194 and 31 candidate specific genes, respectively (Supplemental Table 2).

195

196 Two of the cowpea egg cell-specific candidates identified using the filtering approach were  
197 homologues of the *Arabidopsis* egg cell-specific genes *AtEC1.1*, (Sprunck et al., 2012) and  
198 *AtRKD1* (Koszegi et al., 2011) (*VuEC1.1\_1* and *VuRKD1*; Table 1). Therefore, cowpea  
199 homologues of 11 additional *Arabidopsis* reproductive cell-type expressed genes were  
200 identified for verification analyses. They included *VuKNU-like1* and 2, putative cowpea  
201 homologs of the *Arabidopsis* *KNUCKLES* gene expressed during male and female  
202 gametogenesis (Payne et al., 2004, Tucker et al., 2012) and genes expressed in specific male  
203 and female gametophytic cell-types (Table 1; Supplemental Table 3). Twenty of the 28 (71%)  
204 candidate cell-type specific genes tested by qRT-PCR, were confirmed as significantly  
205 enriched using cDNA isolated from tissues at comparable developmental stages from which  
206 the LCM samples were obtained in addition to other tissue types (Table 1, Supplemental  
207 Table 4).

208

## 209 **Verification of cell-type specific expression using *in situ* hybridization and plant** 210 **transformation**

211 The expression of 11 candidate cell-type specific genes verified using qRT-PCR analyses  
212 above was examined by *in situ* hybridization (ISH), using gene-specific digoxigenin-labelled

213 probes (Fig. 2 and Supplemental Fig. 4). ISH was performed on mature pollen grains to  
214 examine expression of four candidate sperm-cell specific genes, as we had previously  
215 determined that approximately 10 percent of mature pollen grains contain two sperm cells  
216 (Table 1). *VuXTH6* mRNA was detected at high levels in the sperm cells and in the vegetative  
217 nucleus, with low levels detected in the vegetative cell cytoplasm (Fig. 2A-C). By contrast,  
218 mRNA for the other three examined genes was detected in the sperm cells, the vegetative  
219 nucleus and at high levels in the vegetative cell cytoplasm (Fig. 2D-F and Supplemental Fig.  
220 4A-F).

221

222 A combination of whole-mount and section-based *in situ* hybridization was used in  
223 developing cowpea ovules used to examine expression of seven genes during female  
224 gametogenesis. Transcripts of *VuKNU-like1*, the candidate cowpea homolog of the  
225 *Arabidopsis* *KNUCKLES* gene were enriched in the megaspore mother cell; however,  
226 expression was also observed in nucellar and inner integumentary ovule cells (Fig 2G).  
227 Transcripts from the candidate egg cell specific *VuEC1.1\_1* and *VuRKD1* genes (Table 1) were  
228 highly enriched in the egg cell, in comparison to the rest of the embryo sac and ovule. In  
229 both cases, mRNA localization was also evident in the synergids, but not in the central cell  
230 (Fig. 2H; Supplemental Fig. 4G-J). Three of the four candidate central cell genes tested by *in*  
231 *situ* hybridization, displayed specific mRNA localization in the central cell (*VuSDR1*,  
232 *VuGULLO6*; Table 1; Supplemental Fig. 4N and O, Fig 2I). *VuNB-ARC*, mRNA was evident in a  
233 nuclear dot patterning in the cowpea central cell nucleus (Fig. 2I). Nuclear dots are tightly  
234 associated with nascent transcripts of actively expressed genes in the central cell of  
235 *Arabidopsis* (Vielle-Calzada et al., 1999), and in embryonic cells of *Drosophila melanogaster*

236 (Shermoen and O'Farrell, 1991). *VuMEE23* mRNA was localized in the central cell and in  
237 adjacent ovule cells (Table 1).

238

239 As eleven of the cowpea genes predicted to be expressed in specific reproductive cell- types  
240 showed sequence similarity to previously described *Arabidopsis* cell-type expressed genes,  
241 cowpea plants were transformed with constructs comprising *Arabidopsis* (*At*) promoters of  
242 these genes fused to fluorescent reporters to examine conservation of targeting to specific  
243 reproductive cell-types (Table 1; Supplemental Table 3). Six of the tested promoters  
244 directed similar spatial and temporal patterns in cowpea as observed in *Arabidopsis*. The  
245 remaining five showed either non-specific or no detectable expression in transgenic cowpea  
246 (Table 1; Fig. 2 and Supplemental Fig. 4). The *AtKNU* promoter directed expression to the  
247 MMC and PMC cells, as published previously (Tucker et al., 2012) but expression was also  
248 evident in the chalazal region of the cowpea ovule integument (Supplemental Fig. 5F). *In situ*  
249 hybridization using probes to detect native cowpea *VuKNU* expression confirmed expression  
250 in the ovule integument (Supplemental Fig.4K). The *AtDD45* promoter directed expression  
251 to the egg cell (Fig. 2J) and both *AtDD9* and *DD25* promoters enabled central cell expression  
252 (Fig. 2K). The *AtEC1.1* and *RKD2* promoters directed reporter expression to egg cells of  
253 transgenic cowpea (Fig. 2K-M). Expression of fluorescent reporters from *AtRKD2* and *DD45*  
254 promoters was also observed in early cowpea embryos (Fig. 2N-O).

255

256 Given the low efficiency and lengthy nature of the cowpea transformation protocol used,  
257 we also examined if upstream promoter regions of 11 of the cowpea candidate cell-type  
258 specific genes identified from *in silico* analyses would direct the same cell-type expression in  
259 *Arabidopsis*. Genomic fragments of 0.8 to 3.2 kb, corresponding to their upstream putative

260 promoter regions were fused to the *uidA* (GUS) reporter gene and transformed into the  
261 *Arabidopsis* Columbia (*Col-0*) ecotype. For each transcriptional fusion, at least 15  
262 independent transformants were recovered and histologically analyzed to examine gene  
263 expression patterns during male and female gametogenesis. GUS activity was not detected  
264 in reproductive organs of *Arabidopsis* in seven of the 11 tested constructs. However, a 1,429  
265 bp region upstream of *VuKNU-L1* drove GUS expression in the *Arabidopsis* MMC and  
266 adjacent sporophytic ovule cells, in a pattern similar to the *VuKNU-L1* mRNA ISH localization  
267 pattern in cowpea (Supplemental Fig. 6A and Supplemental Table 21). The promoter  
268 fragments from the *pVuXTH32* and *pVuGIM2* genes drove spatial expression in both pollen  
269 sperm and vegetative cells as observed in cowpea ISH experiments (Supplemental Fig. 6F-G).  
270 By contrast, the promoter of *pVuRKD1* drove expression in the egg cell, and in both sperm  
271 and vegetative cells in 5 of the 15 *Arabidopsis* transformants analyzed (Supplemental Fig.  
272 6B-D). In seven of the transformants, expression was seen only in sperm cells (Supplemental  
273 Fig. 6C). Finally, the promoter of the cowpea gene *VuGULL06*, a candidate selected for  
274 potential central cell expression drove expression in the *Arabidopsis* egg cell and synergids  
275 (Supplemental Fig. 6E), suggesting that in some cases cowpea promoters can be influenced  
276 by heterologous factors intrinsic to the *Arabidopsis* genome.

277

278 The promoter analyses indicated that there is some conservation in regulators enabling  
279 reproductive cell-type specific expression in cowpea and *Arabidopsis* given the conservation  
280 of gene expression directed to common cell types in transgenic studies, in some cases.  
281 Taken together, these verification analyses collectively indicated that the developed  
282 transcriptomes were a reliable resource for further *in silico* interrogation of gene expression

283 profiles defining specific reproductive cell-types during male and female gametogenesis and  
284 early cowpea embryogenesis.

### 285 **Enriched biological processes in cowpea reproductive transcriptomes**

286

287 Differentially expressed (DE) genes were identified in each transcriptome type to examine  
288 gene expression changes occurring during the temporal events of male and female  
289 gametogenesis and early embryogenesis (Supplemental Data 4). Percentages of  
290 differentially expressed genes varied widely from 3.4% to 25% amongst the transcriptomes  
291 (Supplemental Table 5). Comparisons between the cowpea female reproductive cell-type  
292 transcriptomes generated using LCM and those previously generated using LCM in  
293 *Arabidopsis* revealed low levels of common genes. Comparisons were made between the  
294 cowpea data set and those generated in *Arabidopsis* for the MMC (Schmidt et al., 2011),  
295 ovule nucellus, early mitotic female gametophytes (Tucker et al., 2012) and the egg and  
296 central cell (Wuest et al., 2010, Steffen et al., 2007). The highest similarity, with a 24%  
297 overlap, was observed between the cowpea MMC dataset and the *Arabidopsis* female  
298 nucellus plus MMC data set (Tucker et al., 2012); Supplemental Table 6). The low levels of  
299 common genes observed may reflect differences in species-specific genes, staging, and  
300 methods used to generate transcriptomes and identify expressed genes.

301

302 To obtain an overview of the major biological processes occurring during gametogenesis and  
303 seed initiation, each transcriptome was initially surveyed by examining significantly enriched  
304 gene ontology (GO) terms in the biological processes' category (Fig. 3A- B). Examination of  
305 the control expanding leaf transcriptome showed that it was, unsurprisingly, enriched in GO

306 terms related to light transduction, chlorophyll, photosynthesis, and sugar metabolism (Fig.  
307 3). Each cowpea reproductive transcriptome was characterized by a relatively distinct set of  
308 significantly enriched biological process terms, supporting the cytologically distinct nature of  
309 the cell-types collected (Fig. 3A-B).

310

311 Meiosis and recombination, and cell wall biogenesis terms, which characterize the  
312 functional and cytological events of male and female sporogenesis in angiosperms, were  
313 found in cowpea meiotic cell transcriptomes. Terms related to a range of pathways involved  
314 in epigenetic regulation were also prevalent in transcriptomes related to the elaboration of  
315 the female and male gametophytes (Fig. 3A-B). Regulation by small RNAs and global  
316 changes in DNA and histone methylation modifications influence determination, selection  
317 and development of gametophytic cells (Tucker et al., 2012, Olmedo-Monfil et al., 2010).  
318 They prevent transposon activation during male and female gametogenesis (Slotkin et al.,  
319 2009, Schoft et al., 2011, Pillot et al., 2010, Ibarra et al., 2012, Martinez et al., 2016). In  
320 *Arabidopsis*, Histone H3 methylation (at lysine (K) 27) by the *Polycomb*-Group protein  
321 repressive complex 2 (PRC2), results in gene silencing and regulates *Arabidopsis* male  
322 gametophyte formation and female gametophyte arrest, pre-fertilization (Mozgova and  
323 Hennig, 2015, Grossniklaus and Paro, 2014, Wang and Kohler, 2017, Kawashima and Berger,  
324 2014).

325

326 The plant hormone auxin is involved in a range of reproductive events in angiosperms,  
327 including initiation of seed formation and embryo patterning. Auxin-related terms were very  
328 evident in this global analysis. Interestingly, the GO enrichment analysis suggested potential  
329 involvement of other plant hormone pathways at particular cowpea developmental stages.

330 For example, the abscisic acid signalling pathway featured in the female MMC and male late  
331 PMC transcriptomes. Brassinosteroid-related terms were evident in dividing embryo sacs  
332 with 2 and 4 nuclei, and terms related to jasmonic acid biosynthetic processes and  
333 responses to cytokinin were evident in the mature cowpea embryo sac (Fig. 3A and  
334 Supplemental Data 6).

335

336 In order to gain greater understanding of reproduction-related gene expression pathways  
337 that cowpea may, or may not have in common with other angiosperms, we profiled the  
338 transcriptome set for the expression of cowpea homologues of *Arabidopsis* genes involved  
339 in meiosis, auxin biosynthesis and signal transduction, epigenetic pathways and cell-cycle  
340 progression. The results of these analyses, in the sections below, collate examined gene  
341 expression profiles during male and female gametogenesis, pre-fertilization female  
342 gametophyte arrest and early embryogenesis.

343

#### 344 **Gene expression during temporal events of cowpea male gametophyte formation**

345 The expression of 18 cowpea meiosis-related gene homologues during male gametogenesis  
346 is shown in Fig. 3C. The profiled genes have putative functions in chromosome pairing,  
347 homologous recombination, and subsequent meiotic events (see Supplemental Table 7 for  
348 functional information and references). A number of these genes were clearly expressed in  
349 non-meiotic cell-type transcriptomes and in leaf (Fig. 3C), consistent with expression data  
350 from other species (Klepikova et al., 2016).

351

352 Analyses of the expression of 276 auxin biosynthesis and signal transduction pathway genes  
353 in male gametogenesis showed high levels of the cowpea *YUCCA6*-like auxin biosynthesis

354 gene in transcriptomes of cowpea late pollen mother cells, tetrads and microspores (Fig. 4A,  
355 Supplemental Table 9). This reflects the requirement of *YUCCA6* and auxin production in  
356 corresponding cells for viable *Arabidopsis* pollen development (Yao et al., 2018). Cowpea  
357 homologs of the *Arabidopsis* *ARF19*, *AIR12* and *DRB1* auxin-responsive genes were also  
358 upregulated during male gametophyte formation (Fig 4B). In *Arabidopsis*, *ARF19* enables  
359 auxin-activated transcriptional responses to phosphate starvation (Huang et al., 2018).  
360 *AIR12* is thought to link auxin signal transduction and reactive oxygen signalling (Gibson and  
361 Todd, 2015) and *DRB1* is involved in cleavage to produce miR399 phosphate homeostasis  
362 regulation (Pegler et al., 2019).

363

364 Cowpea *ARGONAUTE* (*AGO*) genes were identified because *AGO* proteins are central to the  
365 small RNA-mediated processes of Post-transcriptional Gene Silencing (PTGS), microRNA  
366 (miRNA) mediated gene silencing and RNA-directed DNA methylation (RdDM). The 13  
367 cowpea *AGO*-like genes identified showed close phylogenetic relationships with known  
368 *AGOs* in other plants, although *AGO8* and *AGO9* were not evident in the cowpea genome  
369 (Supplemental Fig. 7).

370

371 Analyses of cowpea homologs of genes required for the 21 nt producing *Arabidopsis*  
372 microRNA pathway showed that *AGO1*, *HEN1*, *HYL1* and *HST1* were co-expressed during  
373 meiotic and mitotic stages of male gametophyte development. This suggested potential  
374 conservation of this pathway with a functional role during cowpea male gametophyte  
375 elaboration (Fig. 6A).

376



377 By contrast, the case for a functional *Arabidopsis*-like PTGS pathway operating during male  
378 gametogenesis appeared doubtful. The *Arabidopsis* PTGS pathway typically produces 21-24  
379 nt small interfering (si) RNAs. It requires the function of AGO1, RDR6, SGS3 and DCL4 as core  
380 protein components. However, AGO2, AGO7, and DCL2 can act with partial redundancy with  
381 their respective paralogs (Borges and Martienssen, 2015). Homologs of all core *Arabidopsis*  
382 PTGS components including two *AGO2*, two *AGO7*, four *AGO10* and three *DCL2*-like genes  
383 were identified in the cowpea genome. All of the core components required for *Arabidopsis*-  
384 like PTGS were expressed during male gametogenesis except for *RDR6*, which was  
385 undetectable or expressed at very low levels in all male cell-transcriptome types and at low  
386 levels in the mature pollen-sperm cell sample. By contrast, moderate *RDR6* expression was  
387 evident together with similar or higher expression of the PTGS components in the leaf  
388 transcriptome (Fig. 6A and Supplemental Table 10 and 11). The typical *Arabidopsis*-like PTGS  
389 pathway may not be active during cowpea male gametogenesis.

390

391 The *Arabidopsis* RdDM pathway results in the production of 24nt siRNAs and site-specific *de*  
392 *novo* methylation at their target DNA sites by DNA methyltransferases MET1 and DRM2  
393 (Borges and Martienssen, 2015). Genes required for RdDM including *AGO4*, *AGO5*, *DCL3*,  
394 *RDR2*, *NRPD1* and *NRPE1* (encoding the largest subunits of POL IV and V respectively) were  
395 detected at various stages during male gametogenesis. Transcript levels of *NRPD1*, *RDR2*  
396 and *DCL3* were relatively low. However, highest transcript levels of DNA methyltransferase  
397 *MET1*, *DRM2\_1* and *DRM2\_2* were evident during male meiosis, decreasing during the  
398 mitotic events of gametogenesis (Fig. 6B and Supplemental Table 11). This suggests an  
399 *Arabidopsis*-like RdDM pathway is likely to be functional during cowpea male  
400 gametogenesis.

401

402 Other DNA methyltransferases including CMT2 and CMT3 DNA can maintain CHG/CHH and  
403 CHG methylation, respectively, independently from the RdDM pathway in *Arabidopsis*.  
404 Cowpea homologs of both genes were strongly expressed during male meiosis and mitosis  
405 (Fig. 5B). Interestingly, high transcript levels from the DNA glycosylase *DME* that mediates  
406 DNA demethylation by removing methyl-cytosine and replacing it with unmethylated  
407 cytosine in *Arabidopsis* (Penterman et al., 2007) were found during early cowpea PMC  
408 meiosis (Fig. 6B and Supplemental Table 13). Collectively, these data suggest multiple  
409 pathways inducing dynamic DNA methylation changes may operate during cowpea male  
410 gametogenesis.

411

412 Changes in chromatin histone composition are known to occur during pollen development  
413 in *Arabidopsis*. A total of 44 cowpea histone genes belonging to the core histone families  
414 H2A, H2B, H3 and H4 were identified in cowpea (Talbert et al., 2012); Fig. 6A and  
415 Supplemental Table 12), and their expression profiled during male gametogenesis. A  
416 prevalence of H3.3 histone transcript variants are evident in mature *Arabidopsis* pollen and  
417 H3.1 variants were absent (Borg and Berger, 2015). Analysis of histone gene transcription  
418 during cowpea male gametogenesis showed high levels of the core histone H3.3 transcripts  
419 throughout male gametogenesis, including the mature pollen-sperm cell sample. H3.1\_3  
420 histone transcript levels were also detected during male gametogenesis but were  
421 undetectable in the mature pollen-sperm cell sample, as was a range of other cowpea  
422 histone transcripts (Fig. 6A). These data suggest conservation of transcriptional patterns of  
423 H3.3 and 3.1 expression during pollen maturation in cowpea and *Arabidopsis*.

424

425 Epigenetic processes involving the Polycomb-group repressive complex 2 (PRC2), which  
426 applies a repressive trimethylation mark on lysine 27 of histone H3 (H3K27me3) regulate a  
427 number of events in the plant lifecycle. Proteins forming the PRC2 complex vary in relation  
428 to these functional contexts (Fig. 6B). In *Arabidopsis*, the PRC2 VRN complex, containing  
429 CLF/SWN, VRN2 and FIE proteins, functions during vegetative development and the floral  
430 transition, whereas the EMF complex, containing FIE, MSI1, CLF/SWN and EMF2, functions  
431 during inflorescence development and flower organogenesis. The PRC2 FIS complex,  
432 containing MEA/SWN, FIS2, FIE and MSI1, functions to silence target genes during early seed  
433 development and gametogenesis (Pien and Grossniklaus, 2007). Cowpea homologs of  
434 *Arabidopsis* FIE, MSI1, EMF2, VRN5, VIN3 and EMF1 genes were co-expressed during male  
435 gametogenesis. (Fig. 6C). High levels of a cowpea SWINGER-like (SWN-like) transcript were  
436 observed during late pollen mother cell meiosis and microspore formation. The expression  
437 patterns of the PRC2 complex-like genes during male gametogenesis in cowpea suggest  
438 there is a potential for the formation and function of novel, possibly multiple PRC2  
439 complexes resembling modified versions of the EMF and VRN PRC2 types during male  
440 gametogenesis.

441

442 Jumonji-domain proteins (JMJ) function to demethylate histones, antagonizing the  
443 establishment of histone methylation. JMJ706\_1, JMJ16 and JMJ25\_1 and JMJ25\_5-like  
444 genes, potentially encoding proteins which demethylate histone methylation marks, other  
445 than H3K27 (Fig. 6D) were expressed at elevated levels during cowpea male gametogenesis  
446 (Fig. 6D). In rice, JMJ706 regulates transcription factor expression required for spikelet  
447 development, floral morphology and organ number (Sun and Zhou, 2008) *Arabidopsis* JMJ16

448 represses leaf senescence (Liu et al., 2019) and JM25 functions in poplar to remove  
449 H3K9me2 marks and modulate anthocyanin biosynthesis (Fan et al., 2018).

450

#### 451 **Gene expression during temporal events of cowpea female gametophyte formation**

452

453 Meiosis-related genes were expressed at a number of stages during female gametophyte  
454 development as also observed during male gametogenesis. Transcript levels of meiosis  
455 genes were evident at lower levels throughout female gametogenesis (Fig. 3C). Auxin  
456 biosynthesis gene transcripts were detected from *YUCCA* and *TAR*-like genes during cowpea  
457 megaspore mother cell meiosis (Fig. 4A). In contrast with male gametophyte development,  
458 auxin biosynthesis gene transcripts were generally undetectable in developing cowpea  
459 female gametophytes in most of the post-meiotic developmental stages. Exceptions were a  
460 *TAR2\_3*-like gene expressed at relatively low levels throughout the stages of female  
461 gametogenesis, which was also expressed throughout male gametogenesis, during early  
462 embryogenesis and in leaf (Fig. 4A). *YUCCA6*, *8*, *10* and *TAR4\_2*-like genes were co-  
463 expressed in the EC and CC with *TAR2\_2* showing higher relative EC expression (Fig. 4A;  
464 Supplemental Table 9).

465

466 In direct contrast to the subdued nature of auxin biosynthesis gene expression in developing  
467 female gametophytes, a total of 47 genes annotated generally as “auxin-responsive” were  
468 expressed with RPM counts over 10 in cell-types of the developing female gametophyte  
469 (Fig. 4B and Supplemental Table 9). These genes included 15 *AUXIN RESPONSE FACTORS*  
470 (*ARFs* and five *AUX-IAA* genes, five auxin transporters belong to the *LAX* and *BIG* gene  
471 families, two polar auxin transport *PIN* homologs and three *SMALL AUXIN UP RNA (SAUR)*

472 which are induced in response to auxin (Fig. 4B and Supplemental Table 9). The auxin  
473 induced *AIR12*-like gene was expressed at high levels in both the 4 nucleate and the mature  
474 embryo sacs, which suggests that regulation of reactive oxygen species may be important if  
475 the function of *Arabidopsis* AIR12 is conserved in cowpea.

476

477 The expression of gene components required for *Arabidopsis*-like micro-RNA-mediated  
478 silencing was evident during female gametophyte development. Low levels of *DCL1*, *HYL* and  
479 *HEN* were observed in the mature embryo sac. The relative expression of *DCL1* was  
480 approximately five times higher in the EC than CC (Figure 5A and Supplemental Table 11).  
481 These observations suggest that miRNA induced gene silencing is ongoing during the events  
482 of meiosis and mitosis during female gametogenesis. Potentially, miRNA production may be  
483 more active in the egg than the central cell in mature embryo sacs.

484

485 Examination of expression of homologs of genes involved in the *Arabidopsis* PTGS pathway  
486 showed non-detectable *RDR6* expression as also observed during in male gametogenesis.  
487 Thus either the typical PTGS pathway described for *Arabidopsis* is not active within male and  
488 female cowpea reproductive cell types examined, or other cowpea-specific elements  
489 substitute for generation of 21-24 nt siRNAs (Fig. 5A).

490

491 Expression of the RdDM pathway components during female gametogenesis suggested  
492 functional gene silencing is active during meiosis and mitotic events. High expression levels  
493 of *DME* were also observed in the post-meiotic megaspore tetrad and bi-nucleate mitotic  
494 embryo sacs, suggesting methylation turnover is required for the initiation of the mitotic  
495 embryo sac progression (Fig. 5B). Interestingly, expression of both *AGO4* and *AGO5* were

496 approximately two times and five times higher in the EC than in the CC, respectively. In  
497 addition, *MET1* and *DRM2\_1* were expressed at three-fold and 1.5-fold higher levels in the  
498 EC than CC, respectively. This suggests relatively lower gene silencing activity via the RdDM  
499 pathway in the CC than in the EC (Fig. 5B and Supplemental Table 11). Expression of  
500 homologs of *CMT2* and *CMT3-B* which maintain methylation independently from RdDM  
501 were approximately three times lower in egg than in central cell (Fig. 5B and Supplemental  
502 Table 11). These results suggest a hypothesis that possibly *de novo* DNA methylation via the  
503 RdDM pathway may be reduced in the cowpea CC compared to the EC, while maintenance  
504 of CHG and CHH methylation may be higher in the cowpea CC than the EC. DNA methylation  
505 turnover in the EC and CC may be mediated by *DME* and ROS as indicated by moderate  
506 levels of expression in these cell-types (Fig. 5B).

507

508 Most core histones including *H3.3-1* were expressed at moderate levels during female  
509 development in cowpea. (Fig. 6A and Supplemental Table 14). The MMC showed higher  
510 relative levels of histone *H3.3\_1*, *H4\_1*, *2*, and *3.1\_1* transcripts. *Histone3.3* variants were  
511 expressed throughout gametogenic development, as were a number of *H3.1* variants which  
512 contrasts with the trend observed in male gametogenesis (Fig.6A). High transcript levels of  
513 the JMJ25-like gene were evident at MMC meiosis, together with moderate levels of the  
514 JMJ706 H3K9 demethylase as seen in late pollen mother cell meiosis, suggesting a possible  
515 requirement for H3K9 demethylation in both male and female cowpea meiosis. Expression  
516 of the JMJ histone demethylase JMJ30, which removes H3K27me<sub>2/3</sub> deposited by PRC2  
517 complexes was higher in the female gametophyte than the male (except for the MP-SC  
518 sample; Fig. 6D; Supplemental Table 14).

519

520 In *Arabidopsis*, the PRC2 FIS complex, containing MEA/SWN, FIS2, FIE and MSI1, functions to  
521 silence target genes during embryo sac maturation and early seed development (Mozgova  
522 and Hennig, 2015, Grossniklaus and Paro, 2014). Dynamic expression patterns of a number  
523 of PRC2-like gene homologs were expressed during cowpea female gametogenesis,  
524 including *FIE*, *MSI1*, *EMF1*, *EMF2*, *EMF2*-like, *CLF* and *VRN5* (Fig. 6C). In the mature embryo  
525 sac, egg and central cell samples, *FIE*, *MSI1*, *EMF2\_2*, *EMF2*-like, and *VRN5\_2* were all co-  
526 expressed. High levels of *FIE*, *EMF2*-like, and *VRN5\_2* were evident in the central cell (Fig.  
527 6C). Given the multimeric protein composition of PRC2 complexes, it is not possible to  
528 predict the composition of one or more potential complexes that might be functioning  
529 during cowpea female gametogenesis from these transcriptional analyses.

### 530 **Cell cycle arrest in egg and central cells**

531

532 Cell cycle genes are relatively well conserved across plant species (Wang et al., 2004,  
533 Scofield et al., 2014). Analyses of the expression of cell cycle genes known to block and/or  
534 promote passage through various phases of the cell cycle in isolated cell types has been  
535 used to predict the stage of cell cycle arrest (Juranic et al., 2018, Sornay et al., 2015, Sukawa  
536 and Okamoto, 2018, Velappan et al., 2017, Komaki and Sugimoto, 2012). A core set of cell  
537 cycle genes from *Arabidopsis* was used to identify 141 non-redundant cowpea genes  
538 encoding proteins with various roles in cell cycle regulation, including 46 cyclins (CYC), 12  
539 cyclin-dependent kinases (CDKs) and 5 CDK inhibitors (interactor/inhibitor of cyclin-  
540 dependent kinases/Kip-related proteins; KRP/ICKs) in addition to other key regulators  
541 (Supplemental Table 15 and 16). The expression of these in the central cell and egg cell

542 transcriptomes was used to predict the stage of arrest in both cell-types in mature cowpea  
543 female gametophytes (Fig. 7).

544

545 The transition from G1 to S phase requires activity of CDKA/CYCD complexes to  
546 phosphorylate, and inactivate RBR, thereby enabling E2F transcription factors to drive S-  
547 phase gene expression (e.g. genes such as *PCNA* and *MCM2-7*; (Dante et al., 2014).  
548 Functional activity of the CDKA/CYCD complex at the G1/S transition is also inhibited by  
549 KRP/ICKs, which act on additional CDK/CYC complexes to block transition from G2 to M  
550 (Dante et al., 2014). The protein kinase, *Wee1* can contribute to a block in cell-cycle  
551 progression at the G2/M transition (De Schutter et al., 2007). The MYB3R family members,  
552 MYB3R1 and MYB3R4 transcriptionally activate many G2/M promoting genes (Haga et al.,  
553 2011). MYB3R3 and MYB3R5 negatively regulate transcription of the same genes (Kobayashi  
554 et al., 2015). However, MYB3R1 can also negatively regulate transcription, redundantly with  
555 MYB3R3 and MYB3R5 at G2/M (Kobayashi et al., 2015).

556

557 The egg cell appeared to be arrested in G1/S because expression of RBR and three KRP-like  
558 genes *KRP7/ICK5\_1*, *KRP3/ICK6\_1* and *KRP3/ICK6\_2* was moderate to high in the EC.  
559 Expression of the *CYCDs* (*CYCD2*, *CYCD3*, *CYCD5* and *CYCD6*), indicative of G1 phase, was low  
560 to moderate in the EC while expression of S-Phase genes was moderate to high (Fig. 4,  
561 Supplemental Table 16). The high expression of two repressive *MYB3R5* homologs  
562 (*MYB3R5\_3* and *MYB3R5\_4*) and three *Wee1* homologs (*Wee1\_1*, *Wee1\_2* and *Wee1\_3*) in  
563 the EC (Fig. 7, Supplemental Table 16) suggests that it is unlikely the EC can progress  
564 through the G2/M transition (Kobayashi et al., 2015).

565



566 The central cell appeared to have progressed past S phase and appeared to be arrested in  
567 G2/M because *RBR1* and *KRP7/ICK5\_1* expression were strongly reduced compared to that  
568 in the EC, as was expression of all S phase-related genes (Fig. 5, Supplemental Table 16). The  
569 expression of three *CYCB*-like homologs promoting the G2/M transition, (*CYCB2;3\_1*,  
570 *CYCB2;3\_2* and *CYCB1;2.1\_2*) showed high expression in CC at almost three times that  
571 observed in the egg cell (Fig. 5, Supplemental Table 16). The CC showed only moderate  
572 expression of two G2/M promoting *MYB3R1* homologs, expression of repressive *Wee1\_1*  
573 and *Wee1\_2* was moderate and *MYB3R4* and *MYB3R5* expression was low to undetectable  
574 (Fig. 5, Supplemental Table 16). Taken together, these data indicate the cowpea CC is  
575 preparing to enter M phase.

576

#### 577 **Post-fertilization gene expression in cowpea**

578

579 The GO terms characterizing the early post-fertilization embryo transcriptome comprised of  
580 elongating egg cells, zygotes and early embryos, provided signatures of growth with  
581 microtubule movement, cell proliferation, transcription, translation carbohydrate processes,  
582 and cell wall biogenesis (Fig. 3A). Meiosis transcript expression was restricted to homologs  
583 of *MSH4*, *PRD1*, *OSD1* and *SMG7* (Fig. 3C). A range of auxin biosynthesis-like genes were  
584 expressed including *YUCCA*-likes, 2,3,4, 6, 8 and 10 and *TAR10*-like (Fig. 4A). By contrast, a  
585 lower repertoire of auxin-responsive type gene expression was observed relative to that  
586 seen during male and particularly female gametophyte formation (Fig. 4B). Evidence for  
587 extensive microRNA-induced silencing was low given the low levels of *HEN* and *DCL1*.  
588 Activity of an *Arabidopsis*-like PTGS pathway was unlikely with many components  
589 undetectable (Fig. 5A), and significant RdDM activity at the cell-type stages collected was

590 also doubtful. Expression of other DNA methylation components was evident as was  
591 expression of the DNA demethylase *DME* (Fig. 5B). A repertoire of histones genes were  
592 expressed and expression of a number of PRC2-like genes suppressed. High levels of *JMJ25*-  
593 like gene expression were noticeable suggesting H3K9 demethylation may be supporting  
594 early cowpea embryogenesis (Fig. 6D).

## 595 **Discussion**

### 596 **Cowpea reproductive cell-type transcriptomes: a legume resource**

597

598 The generated cowpea transcriptomes spanning the temporal sequence of events during  
599 male and female gametophyte and early seed development enabled detection of enriched,  
600 specifically expressed genes including cell-type specific genes expressed at low levels.  
601 Verification levels of 71% of cell-type specific expression by qRT-PCR and spatial  
602 confirmation *in situ* hybridization confirmed the utility of these transcriptomes for further  
603 dissection of regulatory networks in cowpea and syntenic legumes. Comparative analyses of  
604 cowpea cell-type specific genes and those specifically expressed in *Arabidopsis*, led to the  
605 identification of *Arabidopsis*-derived promoters directing gene expression to meiotic cells,  
606 the egg and central cells and early embryos of cowpea. This supports the conservation of  
607 some regulatory transcriptional networks during reproductive cell differentiation in both  
608 cowpea and *Arabidopsis*.

609

610 The cowpea meiosis genes identified show strong conservation with those found in other  
611 angiosperms. Cowpea meiosis genes were, however, found to be expressed at moderate  
612 levels in non-meiotic cell-types. *Arabidopsis* tissue RNAseq experiments have also found

613 that meiosis genes are present in many tissues throughout development (Klepikova et al.,  
614 2016). This is consistent with their roles in DNA repair, cell-cycle control and recombination,  
615 and highlights the likely role of cell-specific protein-protein interactions in determining their  
616 molecular function in either meiosis or mitosis (Cromer et al., 2012).

617

618 With respect to the involvement of epigenetic pathways during cowpea reproductive  
619 development, genes encoding cowpea AGO proteins were identified, and transcriptome  
620 analysis suggests an *Arabidopsis*-like RdDM pathway is likely to regulate a number of  
621 reproductive stages. *AGO5*, *AGO4* and *AGO6*-like are expressed throughout female  
622 gametogenesis. Previous work has suggested that *Arabidopsis* *AGO5* is expressed in  
623 sporophytic tissue and plays an important role in defining the MMC prior to meiosis, but is  
624 absent from female gametophyte tissue during subsequent development (Tucker et al.,  
625 2012). The roles of RdDM in female gametophyte development may differ between  
626 *Arabidopsis* and cowpea, and this can be functionally tested.

627

628 By contrast, an *Arabidopsis*-like PTGS pathway does not appear to be functional in the  
629 stages analyzed because RDR6 expression, while detectable in leaf, was not expressed in  
630 reproductive cell-types. An alternative component may substitute for RDR6 in cowpea  
631 reproductive cells. The cowpea cell-type transcriptomes also suggested potential for PRC2-  
632 like complex formation and function during male and female gametophyte formation. The  
633 data revealed the possibility for a number of novel combinations of proteins in such  
634 potential cowpea-PRC2 multimeric complexes. The identified gene candidates could be  
635 tested in protein interaction studies, and mutagenic approaches to confirm complex  
636 components and their functional relevance. Additional insights into pathways evident during

637 cowpea reproductive development which have been uncovered from *in silico* analyses are  
638 discussed further below.

639

#### 640 **Plant hormone pathways involved in cowpea reproductive development and patterning**

641

642 Plant hormones contribute significantly to plant differentiation and growth. In both the  
643 megaspore mother cell and late pollen mother cells, GO terms for “abscisic acid (ABA)  
644 signalling pathway” and response to abscisic acid were enriched. Underpinning genes were  
645 predicted to encode homologs of calcium-dependent protein kinases involved in ABA signal  
646 transduction that influence panicle development and seed formation in rice (Ray et al.,  
647 2007). Homologues of genes involved in the biosynthesis of brassinosteroids, a HERK  
648 receptor-like kinase and a SCARECROW-like transcription factor, involved in perception and  
649 positive regulation of brassinosteroid-mediated gene expression, were expressed during  
650 female embryo sac mitosis. In addition, homologs of genes functioning in reproductive  
651 development in other species, and involved in synthesis and perception of jasmonic acid and  
652 cytokinin were upregulated in mature embryo sacs (Li et al., 2004, Bartrina et al., 2011, Kim  
653 et al., 2005). Functional roles of these genes in cowpea remain to be determined.

654

655 Auxin biosynthesis and auxin-responsive genes were upregulated during early cowpea  
656 pollen development, reflecting the functional requirement for auxin in early *Arabidopsis*  
657 pollen development (Yao et al., 2018). Auxin biosynthesis is also considered important  
658 during *Arabidopsis* female gametophyte development. For example, the auxin biosynthesis  
659 genes *YUCCA1* and *YUCCA2* are considered to be required early for cell specification. Later  
660 expression of *YUCCA8*, *TAA1* and *TAR2* biosynthesis genes are required for nuclear

661 proliferation, vacuole formation and embryo sac growth (Panoli et al., 2015). Studies have  
662 suggested an auxin gradient serves as the morphogen driving female gametophyte cell  
663 specification in *Arabidopsis* (Pagnussat et al., 2009). However, auxin activity has not been  
664 experimentally determined in the developing *Arabidopsis*, maize and *Hieracium pilosella*  
665 female gametophytes during mitotic divisions (Lituiev et al., 2013).

666

667 While *YUCCA* and *TAR*-like auxin biosynthesis genes were expressed in the cowpea female  
668 megaspore mother cell, the expression of auxin biosynthesis genes was barely detectable in  
669 subsequent stages of megagametogenesis except for low levels of *TAR2*. Expression of  
670 *YUCCA6*, *8* and *10* homologs, and *TAR2* and *TAR4* homologs was detected at low levels in  
671 the egg and central cell of the mature embryo sac. The auxin response machinery including  
672 multiple *ARF* transcription factors, *AUX-IAA* genes, *SAUR* genes and auxin transporters was  
673 detected at moderate to high levels. Highest expression levels were evident in the egg cell  
674 and central cell. In the presence of low levels of auxin, *AUX-IAA* proteins interact with the  
675 *ARF* transcription factors and inhibit transcription of auxin responsive genes. At higher auxin  
676 levels, *AUX-IAA* proteins are degraded by the ubiquitination pathway, freeing the *ARF*  
677 transcription factors to promote expression of their target genes (Wang and Estelle, 2014).

678

679 Given that expression of auxin biosynthesis genes was very low in the developing cowpea  
680 female gametophytes, this may indicate that some auxin-related processes are suppressed.  
681 The contrasting pattern of very low levels of auxin biosynthesis gene expression and higher  
682 relative abundance of auxin responsive genes and transporters suggests that if auxin is  
683 involved in cowpea female gametophyte patterning it may be transported in from the  
684 sporophytic tissues post-meiosis. Experiments using auxin sensors in transgenic cowpea may

685 resolve this possibility. Alternatively, auxin may have effects in cowpea sporophytic tissue  
686 that indirectly affect cell fate decisions in the female gametophyte as has been suggested  
687 for *Arabidopsis* and maize (Lituiev et al., 2013).

688

689 **Cell cycle arrest in male and female cowpea gametophytes: involvement of epigenetic**  
690 **regulation**

691 Unlike most other eukaryotes, where the gametes remain in the G1 cell cycle phase through  
692 nuclear fusion at fertilization (karyogamy), higher plants form gametes that undergo  
693 karyogamy in G1, S or G2 phases of the cell cycle (Friedman, 1999). We observed that  
694 cowpea pollen is predominantly bi-cellular, containing a vegetative and a generative cell at  
695 maturity, as approximately 10% of pollen grains contained a vegetative cell and two sperm  
696 cells. Therefore, the events of pollen mitosis II in cowpea continue after pollen-tube  
697 germination. *Arabidopsis* pollen grains are tri-cellular and sperm cells progress through S-  
698 phase after pollen germination to arrive at G2 immediately prior to fertilization (Friedman,  
699 1999).

700

701 Although the cell cycle stage of cowpea sperm cells at fertilization remain to be determined,  
702 similarities in histone transcription were observed between *Arabidopsis* and cowpea during  
703 pollen maturation. Histone *H3.3* and *H3.1* transcripts were detected during cowpea male  
704 gametophyte formation, but histone *H3.1* transcripts were not detected in the mature  
705 cowpea pollen-enriched sperm cell sample, as is also observed in *Arabidopsis*. H3.3 variants  
706 correlate with gene expression in *Arabidopsis*, while H3.1 variants are incorporated during  
707 the S-phase of the cell cycle (Borg and Berger, 2015), and references therein). In rice, EMF2  
708 function is essential for pollen development, and it is thought to interact with a rice MSI1

709 homolog, PTC1 (Deng et al., 2017). Genes encoding homologs of a number of these PRC2  
710 components were also expressed in cowpea pollen development and may have comparable  
711 roles.

712

713 The central cell and egg cell are arrested at different stages of the cell-cycle prior to  
714 fertilization. Studies in maize, rice, barley and *Arabidopsis* suggest that the egg is arrested at  
715 G1 (Chen et al., 2017, Mogensen and Holm, 1995, Sukawa and Okamoto, 2018), while, in  
716 *Arabidopsis*, it has been proposed that the central cell is most likely to be at G2 (Berger et  
717 al., 2008). Analysis of cell cycle gene expression in cowpea egg and central cells indicated  
718 their likely arrest in G1/S and G2/M cell cycle phases, respectively, consistent with that for  
719 *Arabidopsis*.

720

721 Epigenetic pathways involving RdDM and DNA methylation repress transposon activity and  
722 regulate female gametophyte arrest. DNA methylation is very low in the central cell and  
723 reduced in the egg cell (Kawashima and Berger, 2014). RdDM and DNA methylation are  
724 decreased in the central cell, and this allows expression of transposons, which are normally  
725 repressed. Subsequent production of siRNAs that then direct methylation within the egg  
726 cell, prevent transposon activation (Ibarra et al., 2012). In cowpea, expression of *AGO4*,  
727 *AGO5* and *MET1* homologs was several times lower in the central cell than in the EC,  
728 suggesting that *de novo* RdDM may also be less active in the central cell. Furthermore, the  
729 miRNA pathway is likely more active in the cowpea egg cell than in the central cell as the key  
730 components, *AGO1* and *DCL1* are expressed around five times higher in the egg cell. This  
731 corresponds with observations of Wuest et al. (2010), who reported high egg cell expression  
732 levels of *DCL1* and *AGO1* in *Arabidopsis*.

733

734 The transcriptome analyses also suggested that one or more novel PRC2-like complexes may  
735 function to repress female gametophyte initiation in the absence of fertilization via histone  
736 methylation. The conservation of a post-fertilization role of auxin in facilitating embryo  
737 patterning in cowpea is supported by the observation of increased transcription of auxin  
738 biosynthesis genes in the embryo as found in other species (Hands et al., 2016).

739

## 740 **Conclusions**

741 In this study, we have isolated and analysed cell-specific transcriptomes spanning the events  
742 of male and female gametogenesis and early seed formation in cowpea. Cell-specific genes  
743 were identified and validated using a combination of techniques including qRT-PCR and *in*  
744 *situ* hybridization. The transcriptomes have identified gene expression pathways in common  
745 with reproduction in other angiosperms, in addition to novel differences that can be  
746 functionally examined. These cowpea reproductive cell-type transcriptomes provide a useful  
747 resource for the further isolation of cell-type specific promoters, and uncovering  
748 informative pathways which may aid in improving reproductive resilience and yield in  
749 cowpea and related legumes.

## 750 **Materials and Methods**

### 751 **Plant material, tissue collection and generation of RNA sequences**

752 Cowpea plants (*Vigna unguiculata* IT-86D-1010) were grown in the glasshouse under  
753 previously described conditions (Salinas-Gamboa et al., 2016). To collect RNA samples,  
754 tissues at appropriate developmental stages were fixed and processed for LCM according to  
755 previously published protocols (Okada et al., 2013). To collect sperm cells, anthers and



756 stigmas were collected from flowers at anthesis and subjected to osmotic shock in  
757 Brewbaker and Kwack medium (Brewbaker and Kwack, 1963), pH 6.5, supplemented with  
758 12.5% (w/v) sucrose in 15 ml centrifuge tubes. The homogenate was centrifuged at 130  
759 rpm, for 30 minutes at room temperature, then filtered through 150  $\mu$ m and then 30  $\mu$ m  
760 CellTrics nylon sieves (Partec GmbH) and collected in 2 ml microfuge tubes. The  
761 homogenate was centrifuged at maximum speed for 2 minutes to pellet cells, and 50  $\mu$ l was  
762 layered on 0.5ml of 10% Percoll in 2ml microfuge tubes that were centrifuged at 900xg for 2  
763 minutes. 1.5 ml of a solution of 0.52 M (10%) mannitol, 10 mM MOPS buffer (pH 7.5) was  
764 added, and the tubes were centrifuged for 2 minutes at maximum speed. 20 $\mu$ l of the  
765 resulting pellet was added to 30 $\mu$ l of ARCTURUS PicoPure RNA isolation buffer and snap  
766 frozen in liquid nitrogen before storing at -80C. Total RNA was extracted from the LCM  
767 samples and sperm cell enriched samples using the ARCTURUS<sup>®</sup> PicoPure<sup>®</sup> RNA Isolation Kit  
768 (Applied Biosystems<sup>®</sup>) according to the manufacturer's protocol. RNA was subjected to two  
769 rounds of amplification (three rounds for fTET, ES2n and ES4n) using the MessageAmp II  
770 RNA amplification kit (Ambion). Total RNA was extracted from leaf as described (Spriggs et  
771 al., 2018).

772

### 773 **Sequencing and read alignment**

774 Illumina sequencing libraries were prepared from the RNA samples by the Australian  
775 Genome Research Facility (AGRF) and run on the Illumina HiSeq2500 sequencing platform  
776 multiplexed in 3 lanes. At least 36 million reads were produced per sample (approximately  
777 1.6 billion reads, total) of which ~86% could be uniquely aligned to the IT86D-1010 genome  
778 (Spriggs et al., 2018) using the BioKanga software package (Supplemental Table 1,  
779 Supplemental Data 8). A total of 74,839 genes were predicted in the cowpea IT86D-1010

780 genome (Spriggs et al., 2018) using Augustus v 3.1.0 (Stanke and Waack, 2003) and  
781 *Arabidopsis thaliana* (TAIR 10) as the gene training set. As no correlation between gene  
782 length and number of reads aligned was observed (Pearson's correlation coefficient = -  
783 0.010), the Reads-Per-Million (RPM) normalization factor was used in all cases reporting  
784 normalized read counts. The RPM normalized counts between replicates of a cell-type  
785 sample were strongly positively correlated, with a Pearson's correlation coefficient (PCC)  
786 over 0.8 for most samples. Exceptions were replicates in the megaspore mother cell (MMC;  
787 PCC = 0.72), two-nucleate female gametophyte (ES2n; PCC= 0.766) and the pollen  
788 microspore (MIC; PCC = 0.62; Supplemental Fig. 1).

789

#### 790 **R versions and rsgcc analyses**

791 Analyses made using R software packages used R Studio version 1.0.143, with R version  
792 3.4.3 running under Windows 10. The rsgcc software of Ma and Wang (2012) was used as  
793 described by Zhan et al. (2015). The mean RPM normalized counts from each cell-type was  
794 used together with the getsgene() function of the rsgcc R package (rsgcc version 1.0.6) with  
795 the following parameters "getsgene(data, Log = FALSE, tsThreshold = 0.50, MeanOrMax =  
796 "Max)".

797

#### 798 **Gene Ontology annotations**

799 Annotations were made by aligning the predicted IT86D-1010 coding sequences  
800 (Supplemental Data 9) against the NCBI nr protein database (version December 23<sup>rd</sup> 2017)  
801 using the DIAMOND aligner (Buchfink et al., 2015), version 0.9.13 returning at most ten  
802 alignments with a maximum e-value of 1e-5. The generated XML file was supplied to  
803 Blast2GO (version 5.0.13 running on windows 10 with Java version 1.0.8 152), which was run

804 with default parameters, to assign Gene Ontology (GO) annotations (Ashburner et al., 2000,  
805 The Gene Ontology, 2017) to each predicted gene. This approach assigned putative  
806 functional annotations to 54,223 predicted genes, with 39,653 predicted genes assigned GO  
807 terms (Supplemental Data 1).

808

### 809 **Filtering to identify cell-specific genes in the egg cell, central cell and sperm cell** 810 **transcriptomes**

811 Genes specifically expressed in central cell, egg cell and sperm were selected using the filter  
812 function in Microsoft Excel to choose genes with a mean RPM at least five times higher in  
813 the cell-type of interest than any other cell-type (see full criteria in Supplemental Table 2).  
814 No filter was applied to other cell-types in the female gametophyte when selecting egg cell  
815 and central cell genes where the contrast between those two cells was the key criteria.

816

### 817 **Differential expression analysis**

818 Differential expression analysis was carried out using the DESeq2 (version 1.18.1) software  
819 package in R (Love et al., 2014). Analyses were carried out as described except that  
820 differentially expressed genes in each cell-type were identified using the contrast argument  
821 of the results function with parameters set to contrast the expression of each gene in one  
822 cell-type with the average expression of all other cell-types “results(dds, contrast =  
823 list(c(cell\_X), c(all\_other\_cells)), listValues = c(1, -1/13), alpha = .05)”. Genes with adjusted p  
824 value < 0.05 and log2 fold change > 2 were selected as significant (Supplemental Data 5).

825

### 826 **Principal Component Analysis**

827 Principal component analysis was carried out on each replicate of our developed  
828 transcriptomes using the base R `prcomp()` function on read counts transformed by the  
829 variance stabilising transformation, `vst()`, function of DESeq2. Principal components were  
830 plotted in 3D using the `plot3d()` function of the `rgl` package. Colours suitable for all vision  
831 types were chosen from the colour alphabet previously described (Green-Armytage, 2010).  
832 Plots were exported as `.svg` files and figures were assembled in Adobe Illustrator.

833

#### 834 **Comparisons between cowpea and *Arabidopsis* female gametophyte LCM data sets**

835 The best *Arabidopsis* homolog for each predicted cowpea gene was identified by using the  
836 DIAMOND aligner (Buchfink et al., 2015) (version 0.9.13) to align cowpea genes against the  
837 TAIR 10 gene database, and selecting the best match for each cowpea gene (Supplemental  
838 Data 7). *Arabidopsis* gene sets from the MMC (Schmidt et al., 2011), ovule nucellus, early  
839 mitotic female gametophytes (Tucker et al., 2012) and the egg and central cell (Wuest et al.,  
840 2010, Steffen et al., 2007) were compared with the *Arabidopsis* annotations of each cowpea  
841 gene in the differentially expressed genes ( $\log_2$  fold-change  $>2$ ) in corresponding cell-types  
842 from the cowpea dataset.

843

#### 844 **Identification of core meiosis, auxin biosynthesis, auxin-responsive genes and cowpea cell- 845 cycle genes**

846 A set of 18 core cowpea meiosis genes were identified by BlastP search of key genes in the  
847 literature (Supplemental Table 7 and references therein) against the amino acid sequence of  
848 the cowpea IT86D-1010 predicted genes. In each case the best match based on bit-score  
849 was chosen for further analysis. To identify cell-cycle related cowpea genes, the amino acid  
850 sequences of a set of cell-cycle genes from *Arabidopsis* (Juranic et al., 2018) were used in

851 BlastP searches against the predicted cowpea protein sequences. BlastP results with an e  
852 value  $< 1e-20$  were chosen, and the annotation of cowpea sequences matching multiple  
853 *Arabidopsis* genes was chosen based on the highest bit score. The *KRP* gene family and  
854 *cdc25* homologs were selected with an e value  $< 1e-10$ . Where multiple cowpea genes  
855 matched a single *Arabidopsis* gene, these were notated with an underscore and number  
856 after the gene name starting with 1 for the best match and increasing (e.g. VuGene\_1).  
857 Auxin-related genes were identified in the laser captured cell-type transcriptomes, based on  
858 their GO annotations (Supplemental Table 9).

859

#### 860 **Identification of cowpea RNA silencing, RdDM and histone genes**

861 A total of 37 key genes in RNA silencing and RdDM pathways were identified by searching  
862 the annotations produced by the Blast2GO software for genes described in key literature  
863 (Supplemental Table 10). Fragments not encoding full length protein homologs were not  
864 included in further analysis.

865 A total of 49 putative histone encoding genes and 20 JMJ homologs were identified in  
866 annotations produced by Blast2GO as described above. The predicted histone variant  
867 encoded by each gene was assigned based on annotations, and on homology of the  
868 predicted protein to *Arabidopsis* histone amino acid sequence (Supplemental Fig. 7).

869

#### 870 **Phylogenetic tree construction**

871 Phylogenetic trees were made using Geneious version 10.2 (Biomatters,  
872 <https://www.geneious.com>). Trees were built using the following parameters: ClustalW  
873 multiple-sequence alignment with BLOSUM cost matrix, Gap open cost 10, Gap extend cost

874 0.1, Jukes-Cantor Neighbour-Joining consensus tree, no outgroup, Bootstrap resampling  
875 with 1000 replicates, 50% support threshold.

876

### 877 **Validation by qPCR**

878 Whole tissues were collected from the following tissues, emerging leaves, developing stem,  
879 petiole, shoot apical meristems and roots (Supplemental Table 3), frozen in liquid nitrogen  
880 and RNA was extracted with a QIAGEN RNeasy Plant mini kit according to the  
881 manufacturer's protocol, including on-column DNase treatment. cDNA was synthesised  
882 using 1ug of RNA with the SuperScript™ III First-Strand Synthesis System (Thermo Fisher  
883 Scientific). Central cell and sperm genes were selected for testing by qPCR and *in situ*  
884 hybridisation based on specificity in expression and putative function of the predicted  
885 genes. Egg cell genes were chosen for testing based on the specificity of their expression  
886 and homology to *Arabidopsis* genes known to be specifically expressed in egg cell. Genes in  
887 other cell-types tested were selected based on their specificity score in the rsgcc analysis  
888 and on our ability to design primer pairs (Supplemental Table 17) that specifically amplified  
889 the predicted region, including intron structures, from genomic and cDNA. qRT-PCR was  
890 carried out on a Roche Light Cycler ® 480 thermal cycler using SYBR Green I master mix  
891 according to the manufacturer's protocols. Quantification was done using LinRegPCR  
892 software as described (Ruijter et al., 2009, Ramakers et al., 2003).

893

### 894 **In situ hybridization.**

895 ISH was performed as previously described (Jackson, 1992) with some modifications for  
896 improved resolution in reproductive organs of cowpea. For ISH performed on sectioned  
897 specimens, mature unpollinated ovules were fixed in 4% paraformaldehyde and embedded

898 in Paraplast. Sections at 12  $\mu$ g thickness were attached to ProbeOnPlus slides (Fisher  
899 Biotech) and processed as previously described (Jackson, 1992). For whole-mount ISH,  
900 developing ovule primordia, unpollinated mature ovules, and mature anthers were fixed in  
901 paraformaldehyde (4% paraformaldehyde, 2% Triton, and 1 $\times$  PBS in diethylpyrocarbonate  
902 DEPC-treated water) for 2 h at room temperature with gentle agitation, washed three times  
903 in 1 $\times$  PBS-DEPC water, and embedded in 15% acrylamide:bisacrylamide (29:1) using pre-  
904 charged slides (Fisher Probe-On) treated with poly-L-Lys as described (Bass et al., 1997).  
905 Fixed pollen grains were stripped from the anthers before embedding, and incubated with  
906 an enzymatic solution containing 1% driselase, 0.5% cellulose, and 1% pectolyase, for 30  
907 minutes (min) in a humid chamber at 37°C. All samples were subsequently incubated with  
908 0.2M HCl solution for 30 min at room temperature (RT) and in 1 $\mu$ g/ $\mu$ l proteinase K for 30  
909 min at 37°C, before being processed as previously described (García-Aguilar et al., 2005).  
910 Slides containing paraffin sections were mounted on Cytoseal, whereas slides containing  
911 whole specimens were mounted in either 50% (ovules) or 20% (pollen grains) glycerol, and  
912 analyzed with a Leica DMRB microscope under Nomarski illumination.

913

#### 914 **Plasmid construction and cowpea transformation**

915 Gateway entry vectors containing cell-type specific promoter elements together with genes  
916 encoding fluorescent proteins were gifts from Shai Lawit and Marc Albertsen (Lawit et al.,  
917 2013) as follows: *AtDD1<sub>pro</sub>:ZsYellow1*, *AtDD9<sub>pro</sub>:DsRed-Express*, *AtDD25<sub>pro</sub>:DsRed-Express*,  
918 *AtDD31<sub>pro</sub>:AcGFP1*, *AtDD45<sub>pro</sub>:DsRed-Express*, *AtDD65<sub>pro</sub>:AmCyan1*, *AtLat52<sub>pro</sub>:AcGFP1*,  
919 *AtRKD2<sub>pro</sub>:DsRed-Express*. The promoter element of *AtEC1.1* was amplified from *Arabidopsis*  
920 Col-0 DNA by PCR with primers including adapter elements, and cloned into gateway entry  
921 vectors containing AmCyan1. The *AtDUO1* promoter was synthesized and cloned into pMK-

922 RQ by GeneArt (Thermo Fisher Scientific) with SfiI and BglII sites introduced for subsequent  
923 cloning into gateway entry vector containing AcGFP1.

924

925 A gateway-compatible binary vector pOREOSAr4r3 was created by insertion of a Gateway  
926 recombinational cassette amplified from pDESTr4r3 (Invitrogen) into ClaI and KpnI sites of  
927 pOREOSA vector backbone, which was a gift from Thomas J. Higgins, CSIRO. Reporter entry  
928 clones were introduced into the pOREOSAgw expression vector via multisite Gateway  
929 recombination. Final constructs contained either triple or quadruple fluorescent labels  
930 (Supplemental Table 20). AtKNU:YFP:3'KNU cassette was previously described (Tucker et al.,  
931 2012) and was inserted into the pOREOSA via HindIII digestion. Gateway cloning reactions  
932 were performed with LR Clonase II Enzyme mix (ThermoFisher Scientific). All plasmid vectors  
933 were verified by sequencing and final constructs electroporated into *Agrobacterium*  
934 *tumefaciens* strain AGL1 for use in cowpea stable transformation (see below). Details of the  
935 primer sequences and constructs transformed into cowpea are described in Supplemental  
936 Tables 19 and 20. Cowpea transformation was carried out using *Agrobacterium*-mediated  
937 transformation of cotyledonary nodes (Popelka et al., 2006). Transformed explants were  
938 first selected on a medium containing 100 mg/L kanamycin and then on 20 mg/L geneticin  
939 (G-418) for up to 3-6 months. Shoots developing healthy roots were transferred into 90mm  
940 small pots containing sterilized soil mixture (Van Schaik's Bio-Gro Pty Ltd, Australia),  
941 acclimatized in the growth room at 22°C with 16h photoperiod for up to 4 weeks, and then  
942 transferred to the glasshouse in larger 4.5L pots. PCR was performed to confirm the  
943 presence of the *nptII* and reporter genes with the primers listed in Supplemental Table 19.  
944 The number of independent cowpea transgenic lines per construct varied from three to 15.



945

#### 946 **Fluorescent microscopy and clearing procedures**

947 Samples were examined using a Zeiss fluorescence microscope (Axio Imager M2; Carl Zeiss)  
948 with an HXP 120 light source. Digital images were captured using an AxioCam HRc camera  
949 and ZEN 2.6 software (Carl Zeiss). Signals from dsRED-Express were observed with the Zeiss  
950 filter set 43, AcGFP1 signals were observed with the Zeiss filter set 13, AmCyan1 signals  
951 were observed with Zeiss filter set 47, while YFP and ZsYellow1 signals were observed with  
952 Zeiss filter set 46. The exposure time was adjusted to as appropriate for each sample.  
953 Images were processed in ZEN2.6 software and assembled in Adobe Photoshop. The  
954 method previously described in (Salinas-Gamboa et al., 2016) was used when tissue clearing  
955 was required. For light microscopy, the Zeiss Axioskop 2 microscope equipped with  
956 Nomarski optics, Spot Flex colour camera and Spot 5.1 software was used to capture images  
957 (Diagnostic Instruments, Inc).

958

#### 959 **Generation of transgenic *Arabidopsis* with cowpea promoter constructs**

960 The regulatory region of eleven cowpea genes was transcriptionally fused to the *uidA* (*GUS*)  
961 reporter gene by amplifying a fragment corresponding to either the complete intergenic  
962 region (*VuNB-RCpro*; *VuSDR1pro*) or an arbitrary fragment (*VuBAS1pro*; *VuGULL06pro*;  
963 *VuRKD1pro*; *VuEC1.1pro*; *VuGIM2pro*; *VuXTH6pro*; *VuXTH32pro*; *VuAt3g09950pro*; *VuKNU-*  
964 *L1pro*) located upstream of its coding sequence but excluding the 5' untranslated region  
965 (see Suppl Table 21 for primers). Amplicons were cloned into pCR8 TOPO TA (Invitrogen)  
966 and used as donors in LR recombination (LR Clonase II; Invitrogen) with pMDC162 (Curtis  
967 and Grossniklaus, 2003), producing a binary vector that contains the *uidA* reporter gene.

968 Transgenic Col-0 plants were obtained by floral dipping as previously described (Clough and  
969 Bent, 1998). At least 15 T1 individuals were obtained and analyzed to quantify the  
970 frequency of GUS expression at different stages of male and female reproductive  
971 development. GUS staining assays for stages before fertilization were conducted as  
972 described (Vielle-Calzada et al., 2000).

973

974 **Accession numbers**

975 **Large datasets**

976 .bam files of sequences from

977 TO BE CONFIRMED

978

979 Fasta.gz archives of raw reads for MMC, EM and Sp

980

981 **Supplemental Material**

982 **Supplemental Tables**

983 **Supplemental Table 1. Align stats**

984 Number and proportion of Illumina reads aligned against the IT86D genome for each sample

985 **Supplemental Table 2. Filtering**

986 Criteria and results of selecting genes based on filtering in Excel

987 **Supplemental Table 3. *Arabidopsis* Reproductive genes and promoters**

988 Summary of *Arabidopsis* reproductive cell-specific gene expression of their Cowpea

989 homologs in cowpea and activity of their promoters driving transgenes in *Arabidopsis*

990 **Supplemental Table 4. qPCR**

991 Table of tissues and results of qRT-PCR validation of cell-specific gene expression

992 **Supplemental Table 5. CS\_DE\_gene\_overlap**

993 Table summarising the number of common genes between cell-specific and differentially

994 expressed datasets.

995 **Supplemental Table 6. Compare datasets**

996 Comparison of published cell-specific datasets with our transcriptomes

997 **Supplemental Table 7. Meiosis genes**

998 Names and references for the cowpea homologs of genes involved in meiosis

999 **Supplemental Table 8. Meiosis RPM**

1000 Expression of meiosis genes as RPM counts

1001 **Supplemental Table 9. Auxin genes**

1002 Expression of annotated auxin related genes as RPM counts

1003 **Supplemental Table 10. RNAi, RdDM refs**

- 1004 Names, functions and references for the cowpea homologs of genes involved in RNA  
1005 silencing and RdDM
- 1006 **Supplemental Table 11. RNAi, RdDM RPM counts**
- 1007 Expression of RNAi and RdDM genes as RPM counts
- 1008 **Supplemental Table 12. Histone RPM counts**
- 1009 Expression of histone genes as RPM counts
- 1010 **Supplemental Table 13. PRC RPM counts**
- 1011 Expression of PRC genes as RPM counts
- 1012 **Supplemental Table 14. JMJ RPM counts**
- 1013 Expression of JMJ genes as RPM counts
- 1014 **Supplemental Table 15. Cell-cycle genes**
- 1015 Names and references for the cowpea homologs of genes involved in cell-cycle progression
- 1016 **Supplemental Table 16. Cell-cycle RPM**  
1017  
1018 Expression of cell-cycle genes as RPM counts
- 1019 **Supplemental Table 17. Oligonucleotide sequences for qRT-PCR**
- 1020 Sequences of oligonucleotide primer sequences used for qRT-PCR in this study
- 1021 **Supplemental Table 18. Probe sequences**
- 1022 Sequences used in RNA *in situ* probes
- 1023 **Supplemental Table 19. Cloning Primers**
- 1024 Sequences of primers used in creating plasmids used in this study
- 1025 **Supplementary Table 20. Plasmid constructs**
- 1026 List of plasmid constructs used in this study
- 1027 **Supplemental Table 21. Activity of Cowpea promoters**
- 1028 Activity of cowpea promoters in *Arabidopsis thaliana*

1029

1030 **Supplemental Data**

1031 **Supplemental Data 1: IT86D-1010 genes and GO annotation**

1032 Large table with GO annotations and descriptions for all cowpea predicted genes

1033 **Supplemental Data 2: Mean RPM counts**

1034 Large table with the average RPM counts for all genes in all cell-types

1035 **Supplemental Data 3: Cell-specificity scores and RPM counts**

1036 Large set of tables with all genes in each of the cell-specific gene sets

1037 **Supplemental Data 4: Cell-specific gene annotations**

1038 Large set of tables with all cell-specific genes for each cell-type and their GO annotations

1039 **Supplemental Data 5: log<sub>2</sub> FC<sub>2</sub> DE genes**

1040 Large set of tables with all genes DE at log<sub>2</sub> fold-change 2 in each of the cell-types

1041 **Supplemental Data 6: DE enriched GO terms**

1042 Large set of tables with the enriched biological process GO terms from each of DE gene sets

1043 **Supplemental Data 7: BlastP comparing Vu and At**

1044 Large table containing the best *Arabidopsis* protein match by homology to the translated

1045 coding sequence of each predicted cowpea gene

1046 **Supplemental Data 8: Raw aligned read counts**

1047 A csv file with the raw counts of aligned to each gene in each replicate.

1048 **Supplemental Data 9: Predicted gene coding sequences**

1049 A fasta file with the coding sequences of all IT86D-1010 predicted genes.

1050

1051

1052

1053 **Acknowledgments**

1054 We are grateful to Tracy How and Dilrukshi Nagahatenna for their assistance with cowpea  
1055 transformation and growth, to Natalia Bazanova for assistance with cloning, and to Steven  
1056 Henderson for suggestions concerning the *in silico* identification of cowpea cell-specific  
1057 genes.

1058

1059

1060

1061

1062

1063

1064

1065

1066

1067

1068

1069

1070

1071

1072

1073

1074

1075

1076

**Table 1.** Genes and promoters tested for cell-type specificity by qPCR, *in situ* hybridization and transformation in cowpea.

| Cowpea gene or reporter construct | Arabidopsis homolog | Arabidopsis annotations / predicted localisation                         | Cell-type localization ( <i>in silico</i> RNA-Seq) | Tissue localization by qPCR  | Cell type localization by <i>in situ</i> <sup>c</sup> | Promoter directed gene expression in transgenic cowpea |
|-----------------------------------|---------------------|--------------------------------------------------------------------------|----------------------------------------------------|------------------------------|-------------------------------------------------------|--------------------------------------------------------|
| VuMAP3K17-like                    | At2g32510           | mitogen-activated protein kinase kinase 17                               | MMC                                                | MMC                          | -                                                     | -                                                      |
| VuCPK1                            | At5g04870           | calcium dependent protein kinase 1                                       | MMC                                                | MMC, MIC                     | -                                                     | -                                                      |
| VuLBD12                           | At2g30130           | Lateral organ boundaries domain family protein                           | ftTET                                              | ftTET                        | -                                                     | -                                                      |
| Vu.g6173                          | At4g35670           | Pectin lyase-like superfamily protein                                    | ftTET                                              | MIC, SC                      | -                                                     | -                                                      |
| VuLHL3                            | At1g64625           | Plant-specific basic helix-loop-helix (bHLH) protein                     | ES4n                                               | ES2n/4n                      | -                                                     | -                                                      |
| Vu.g43722                         | At1g68040           | S-adenosyl-L-methionine-dependent methyltransferases superfamily protein | ES2n                                               | ES2n/4n                      | -                                                     | -                                                      |
| Vu.g2461                          | ??                  | unknown                                                                  | ES2n                                               | ES2n/4n                      | -                                                     | -                                                      |
| VuGULLO6                          | At2g46670           | FAD-dependent oxidoreductase                                             | CC                                                 | CC/EC                        | CC                                                    | -                                                      |
| VuNB-ARC                          | At3g14470           | NB-ARC domain disease resistance protein                                 | CC                                                 | ftTET, ES2n/4n               | CC <sup>d</sup>                                       | -                                                      |
| VuSDR1                            | At3g61220           | NADP-binding Rossmann-fold protein                                       | CC                                                 | NS                           | CC                                                    | -                                                      |
| VuMEE23                           | At2g34790           | Berberine Bridge Enzyme-like protein                                     | CC                                                 | CC/EC                        | CC, NC                                                | -                                                      |
| VuBAS1                            | At2g26710           | Cytochrome P450 superfamily protein                                      | CC                                                 | CC/EC                        | -                                                     | -                                                      |
| VuEC1.1_1                         | At1g76750           | cytosine-rich secreted protein                                           | EC                                                 | CC/EC                        | EC, Sy                                                | -                                                      |
| VuEC1.1_2                         | At1g76750           | cytosine-rich secreted protein                                           | EC                                                 | CC/EC                        | EC, Sy                                                | -                                                      |
| VuRKD1                            | At1g18790           | RWP-RK domain transcription factor                                       | EC                                                 | CC/EC                        | EC, Sy                                                | -                                                      |
| VuCAP                             | At3g19690           | CAP superfamily protein                                                  | Em                                                 | Em                           | -                                                     | -                                                      |
| VuZFP                             | At5g01860           | C2HC zinc fingers superfamily protein                                    | Em                                                 | MMC, ftTET, mTET, Em         | -                                                     | -                                                      |
| VuVRN1                            | At3g18990           | AP2/B3-like transcriptional factor family protein                        | Em                                                 | Roots, Petiole, Leaf, EC, Em | -                                                     | -                                                      |
| VuLBD13                           | At2g30340           | LOB domain-containing protein 13                                         | Em                                                 | Em                           | -                                                     | -                                                      |
| Vu.g56782                         | At4g24130           | Protein of unknown function, DUF538                                      | mTET                                               | mTET                         | -                                                     | -                                                      |
| VuPPCK                            | At3g04530           | phosphoenolpyruvat                                                       | mTET                                               | mTET                         | -                                                     | -                                                      |



|                      |           |                                           |                    |                  |           |              |
|----------------------|-----------|-------------------------------------------|--------------------|------------------|-----------|--------------|
|                      |           | e carboxylase kinase 2                    |                    |                  |           |              |
| VuXND1               | At5g64530 | xylem NAC domain 1                        | mTET               | mTET             | -         | -            |
| VuSRO2               | At1g23550 | similar to RCD one                        | mTET               | Seedling, roots  | -         | -            |
| VuXTH6               | At5g65730 | xyloglucan endotransglucosylase hydrolase | SC                 | SC               | SC, VN    | -            |
| VuXTH32              | At2g36870 | xyloglucan endotransglucosylase hydrolase | SC                 | SC               | SC, VC    | -            |
| VuGIM2               | At2g36690 | 2-oxoglutarate-dependent dioxygenase      | SC                 | SC               | SC, VC    | -            |
| VuAt3g09950          | At3g09950 | unknown                                   | SC                 | Roots, seedlings | SC, VC    | -            |
| VuKNU-like1          | At5g14010 | C2H2 zinc finger protein                  | MMC, PMC, mTET, SC | MMC, mTET, SC    | MMC+NC+II | -            |
| VuKNU-like2          | At5g14010 | C2H2 zinc finger protein                  | MMC, Em            | MMC, MIC         | -         | -            |
| AtRKD2 <sup>e</sup>  | At1g74480 | EC                                        | -                  | -                | -         | EC, Em       |
| AtEC1.1 <sup>e</sup> | At1g76750 | EC                                        | -                  | -                | -         | EC           |
| AtDD45 <sup>e</sup>  | At2g21740 | EC                                        | -                  | -                | -         | EC           |
| AtDD1 <sup>e</sup>   | At1g36340 | AC                                        | -                  | -                | -         | non-specific |
| AtDD9 <sup>e</sup>   | At1g26795 | CC                                        | -                  | -                | -         | CC           |
| AtDD25 <sup>e</sup>  | At3g04540 | CC                                        | -                  | -                | -         | CC           |
| AtDD65 <sup>e</sup>  | At3g10890 | CC                                        | -                  | -                | -         | ND           |
| AtDD31 <sup>e</sup>  | At1g47470 | SC                                        | -                  | -                | -         | ND           |
| AtDUO1 <sup>e</sup>  | At3g60460 | SC                                        | -                  | -                | -         | ND           |
| AtLAT52 <sup>e</sup> | At5g45880 | VC                                        | -                  | -                | -         | ND           |
| AtKNU <sup>e</sup>   | At5g14010 | MMC + PMC                                 | -                  | -                | -         | MMC, PMC, II |

#### Footnotes

<sup>a</sup>Based on *Arabidopsis thaliana* genome annotation TAIR 10.

<sup>b</sup>Based on laser-capture cell transcriptomes

<sup>c</sup>Based on *in situ* hybridization

<sup>d</sup>Shows nuclear dots corresponding to active transcription in the central cell nuclei

<sup>e</sup>Fluorescent reporter gene constructs

Abbreviations: CC, central cell; EC, egg cell; II, inner ovule integument; MMC, megaspore mother cell; NC, nucellar cells; SC, sperm cell; Sy, synergid; VC, vegetative cell; VN, vegetative nucleus.

1078 **Table 2.** The number of genes upregulated in each cell-type compared to the average  
1079 expression in all cell-types.

| Cell type | Number of genes differentially upregulated |
|-----------|--------------------------------------------|
| MMC       | 5878                                       |
| fTET      | 2316                                       |
| ES2n      | 2627                                       |
| ES4n      | 1423                                       |
| CC        | 1897                                       |
| EC        | 1550                                       |
| MES       | 3376                                       |
| Em        | 5051                                       |
| PMCE      | 1282                                       |
| PMC L     | 2653                                       |
| mTET      | 3743                                       |
| MIC       | 3101                                       |
| sperm     | 38691                                      |
| Leaf      | 9140                                       |

1080

1081 **Figure Legends**

1082

1083 **Figure 1.** Stages of reproductive development in cowpea and gene expression in developed  
1084 transcriptomes.

1085 A, Cartoon of temporal stages of male and female gametophyte development showing cell-  
1086 type stages collected by LCM for RNAseq. For detail refer to text. B, The number of genes  
1087 expressed in each transcriptome set (RPM >0). C, The proportion of genes expressed at very  
1088 low (<1RPM), low (1-5RPM), moderate (5-20RPM) or high (>20RPM) levels in RNAseq sets.  
1089 Abbreviations: MMC, megaspore mother cell; fTET, female tetrads; FM, functional  
1090 megaspore selection stage (not collected); ES2n, mitotic embryo sac with 2 nuclei; ES4n,  
1091 embryo sac with 4 nuclei; MES, mature embryo sac at anthesis, where antipodals have  
1092 degenerated, containing the egg cell (EC), flanking synergids (Sy, not collected), and central  
1093 cell (CC); Em, embryo; En, endosperm (not collected); PMC.E, early pollen mother cell;  
1094 PMC.L, late pollen mother cell; mTET, male tetrads; MIC, uninucleate microspore; Bi,  
1095 bicellular pollen stage; Tri, tricellular pollen stage, two sperm cells (SC) in the emerging  
1096 pollen tube; MP-SC, mature pollen-sperm cell.

1097

1098 **Figure 2.** Gene expression in cowpea reproductive cell-types.

1099 A – J, Whole-mount *in situ* hybridization (WISH) in pollen grains of cowpea using four  
1100 different antisense probes. A-C, *VuXTH6* mRNA in sperm cells A and vegetative nucleus B,  
1101 with no signal in the sense control C. D and E, *VuXTH32* mRNA was detected in sperm cell  
1102 and vegetative cell cytoplasm. F, *VuXTH32* sense controls. G, Whole-mount ovule undergoing  
1103 megasporogenesis showing *VuKNU1* mRNA localized in the MMC, the nucellus and the inner  
1104 integument. H, Paraffin section through a differentiated female gametophyte showing

1105 *VuRKD1* mRNA localization in the egg cell and synergids. I, Paraffin section through a  
1106 differentiated female gametophyte showing *VuNB-ARC* mRNA localization in the central cell.  
1107 Inset shows fused polar nuclei showing active transcription of *VuNB-ARC*. J,  
1108 *AtRKD2<sub>pro</sub>:dsRED-Express* (red) in EC and *AtDD9<sub>pro</sub>:AmCyan1* (cyan) in the CC one day before  
1109 anthesis. K, *AtEC1.1<sub>pro</sub>:AmCyan1* (cyan) in EC and *AtDD25<sub>pro</sub>:dsRED-Express* (red) in CC. L-M,  
1110 *AtDD45<sub>pro</sub>:dsRED-Express* (red) in an isolated egg cell, N, two-celled proembryo and O, early  
1111 embryo.

1112 Abbreviations: EC, egg cell; CC, central cell; Sy, synergids; SC, sperm cells; VN, vegetative  
1113 nucleus, MMC, megaspore mother cell.

1114 Scale bars: A-G, L-M = 10  $\mu\text{m}$ , H = 8  $\mu\text{m}$ , I = 14  $\mu\text{m}$ , J-K = 50  $\mu\text{m}$ , N-O = 20  $\mu\text{m}$ .

1115

1116 **Figure 3.** Differentially enriched Biological Process GO terms and expression of meiosis genes  
1117 during gametogenesis.

1118 A, Enriched GO terms primarily in female gametophyte and early embryo transcriptomes. B,

1119 Enriched GO terms primarily in the male gametophyte and leaf transcriptomes. The

1120 statistical significance of the GO enrichment is represented according to the scale of

1121 weighted Fisher p value shown at the bottom right. C, Expression of genes involved in

1122 meiosis in the generated cowpea transcriptomes (See also Supplemental Tables 7 and 8).

1123 Expression levels relate to the RPM scale.

1124

1125 **Figure 4.** Expression of auxin biosynthesis and auxin responsive genes during meiosis and  
1126 gametophyte development.

1127 A, Expression of genes belonging to the YUCCA and TAR auxin biosynthesis families. B,

1128 Expression of 60 auxin responsive genes sorted in decreasing order of expression level in the

1129 2-nucleate embryo sac. Expression levels are related to the RPM scale with each respective  
1130 panel. (See also Supplemental Table 9).

1131

1132 **Figure 5.** Heatmaps representing the expression of selected genes involved in RNA-mediated  
1133 gene silencing and DNA methylation.

1134 A, Expression of genes involved in the miRNA-mediated gene silencing pathway and in PTGS.

1135 B, Expression of genes that interact with RNA and are involved in RdDM, DNA

1136 methyltransferases that mediate RdDM and DNA glycosylases that mediate demethylation of

1137 DNA. Expression level is according to the RPM scales for each panel. (See also Supplemental

1138 Tables 12 and 13).

1139

1140

1141 **Figure 6.** Histone gene expression and the expression of selected genes involved in histone  
1142 modification.

1143 A, Expression of genes belonging to the core histone family (See Supplementary Table 18).

1144 B, Expression of selected PcG genes involved in histone methylation resulting in gene

1145 silencing (See Supplementary Table 19). C, Known protein interactions forming Polycomb-

1146 group repressive 2 complex types. Accessory proteins (X) are often associated with PRC2

1147 complex function. Asterisks indicate *Arabidopsis* specific proteins. MEA and *Arabidopsis*

1148 counterparts, SWN and CLF are SET domain proteins and homologs of *Drosophila* Enhancer

1149 of Zeste. FIS2 and others listed are VEFS-box proteins. FIE and MSI1 are WD40 repeat

1150 protein containing proteins (Mozgova and Henning, 2015). D, Expression of selected JMJ

1151 family histone demethylase genes and demethylation targets, at left (See also Supplemental

1152 Tables 14, 15, 16). Expression levels relate to the RPM scales associated with each panel.

1153

1154 **Figure 7.** Expression of selected cell cycle genes in egg, central cell, mature pollen-sperm  
1155 and leaf transcriptomes.

1156 Cell cycle genes are grouped according to their function relating to roles in promoting or  
1157 blocking progression through various cell cycle phases. Relative expression level is indicated  
1158 according to the RPM scale shown at the bottom of each panel. (See also Supplemental  
1159 Tables 10 and 11).

1160

1161 **Supplemental Figure. 1.** Correlation between RNAseq replicates.

1162 Scatter plot of log-transformed mean RPM counts of replicates for each tissue. Replicate 1  
1163 and replicate 2 for each cell-type are shown on the Y and X axes, respectively.

1164

1165 **Supplemental Figure. 2.** Principal component analysis (PCA).

1166 PCA plot showing relationships between all transcriptomes.

1167 Abbreviations: MMC, megaspore mother cell; fTET, female tetrads; ES2n, mitotic embryo  
1168 sac with 2 nuclei; ES4n, embryo sac with 4 nuclei; MES, mature embryo sac at anthesis,  
1169 containing the egg cell (EC) and central cell (CC); Em, embryo; PMC.E, early pollen mother  
1170 cell; PMC.L, late pollen mother cell; mTET, male tetrads; MIC, uninucleate microspore; MP-  
1171 SC, mature pollen-sperm cell.

1172

1173 **Supplemental Figure. 3.** Cell-specific genes expression

1174 Heat-map of scaled RPM expression values of the cell-specific genes identified using the  
1175 rsgcc software package

1176

1177 **Supplemental Figure. 4.** *In situ* hybridization of cell-specific cowpea genes in gametophytic  
1178 tissue and fluorescent reporters expressed from *Arabidopsis* cell-specific promoters in  
1179 cowpea.  
1180 A-B, *VuXTH32* mRNA localized in the sperm cells and vegetative cell cytoplasm. C, *VuXTH32*  
1181 sense control. D-E, *VuAt3g09950* mRNA abundantly localized in the sperm and vegetative  
1182 cells. F, sense *VuAt3g09950* control. G, Paraffin section through a fully differentiated female  
1183 gametophyte showing *VuEC1.1* mRNA localization in the egg cell. H, Consecutive section to  
1184 (G) showing *VuEC1.1* mRNA localization in the synergids. I, Detail of G showing mRNA  
1185 localization in the egg cell. J, Detail of H showing mRNA localization in the synergids. K,  
1186 Whole-mounted ovule showing *VuMEE23* mRNA localization in the central cell and adjacent  
1187 nucellar cells. L-M, *AtDUO1<sub>pro</sub>:AcGFP1* no expression. N, Whole-mounted ovule showing  
1188 *VuSDR1* mRNA localization in the central cell. O, Whole-mounted ovule showing *VuGULL06*  
1189 mRNA localization confined to the central cell. P, No expression of *AtLAT52<sub>pro</sub>:AcGFP1* in  
1190 germinating pollen. Q, Mature female gametophyte with egg cell, polar nuclei and central  
1191 cell in cleared ovule. R, *AtDD45<sub>pro</sub>:dsRED-Express* (red) in EC and general pattern of the  
1192 *AtDD1<sub>pro</sub>:ZsYellow1* (yellow) in cells external to the embryo sac and in CC. S,  
1193 *AtEC1.1<sub>pro</sub>:AmCyan1* (cyan) in zygote and *AtDD25<sub>pro</sub>:dsRED-Express* (red) in early endosperm.  
1194 T, *AtRKD2<sub>pro</sub>:dsRED-Express* (red) in zygote and *AtDD9<sub>pro</sub>:AmCyan1* (cyan) in early  
1195 endosperm. U, *AtRKD2<sub>pro</sub>:dsRED-Express* in early embryo. *AtDD9* is not expressed at this  
1196 stage. V, Cleared ovule showing early embryo corresponding to the stage in U.  
1197 Scale bars: A-F, I-J = 10  $\mu$ m; G-H = 18  $\mu$ m; K, N-O = 35  $\mu$ m; L-M, P-T = 50  $\mu$ m; U-V = 100  $\mu$ m  
1198 Abbreviations: EC, egg cell; CC, central cell; Sy, synergids; SC, sperm cells; VN, vegetative  
1199 nucleus; PN, polar nuclei; Em, embryo; En, endosperm; Zy, zygote.

1200

1201 **Supplemental Figure. 5.** Expression of the KNU genes in cowpea.

1202 A, Whole-mount pre-meiotic ovule showing *VuKNU1* mRNA localized in the MMC and the  
1203 developing nucellus at the onset of integument initiation. B-D, Micrographs of cowpea  
1204 ovules expressing a *AtKNU<sub>pro</sub>:nlsYFP* reporter construct marking MMC fate. E-F, At the end  
1205 of meiosis the KNU promoter turns off in female functional megaspore, but the expression  
1206 persists in somatic ovule cells at the chalazal end. G-H, Expression of  
1207 *AtKNU<sub>pro</sub>:nlsYFP* reporter construct during male meiosis. I, Male tetrad showing no  
1208 expression of reporter construct. J, After the first pollen mitosis, the expression of reporter  
1209 construct is evident in both vegetative and generative nucleus. K, Mature pollen grain does  
1210 not show any expression.

1211 Abbreviations: MMC, megaspore mother cell; GC, generative cell; VN, vegetative nucleus.

1212 Scale bars: A = 10  $\mu$ m; B = 100  $\mu$ m; C-H = 50  $\mu$ m; I-K = 20  $\mu$ m.

1213

1214 **Supplemental Figure. 6.** Specific activity of cowpea promoters in reproductive cells of  
1215 *Arabidopsis thaliana*. A, *VuKNU-L1<sub>pro</sub>:GUS* expression in the developing ovule of *Arabidopsis*.  
1216 B, *VuRKD1<sub>pro</sub>:GUS* expression in the egg cell. C, *VuRKD1<sub>pro</sub>:GUS* expression in a sperm cell. D,  
1217 *VuRKD1<sub>pro</sub>:GUS* expression in the vegetative cell. E, *VuGULL06<sub>pro</sub>:GUS* in the egg apparatus.  
1218 F, *VuXTH32<sub>pro</sub>:GUS* expression in the vegetative cell. G, *VuGIM2<sub>pro</sub>:GUS* expression in the  
1219 vegetative cell. Scale Bars: A, F, and G = 10  $\mu$ m; B and D = 20  $\mu$ m; C and D = 8  $\mu$ m.

1220

1221 **Supplemental Figure. 7.** Phylogeny of the AGO family in cowpea and *Arabidopsis*

1222 A Jukes-Cantor Neighbour-Joining consensus tree showing the relationship between the  
1223 AGO genes identified in cowpea (*Vu*) and those known in *Arabidopsis* (*At*).



1224 Parameters for tree building were ClustalW MSA with BLOSUM cost matrix, Gap open cost  
1225 10, Gap extend cost 0.1. Jukes-Cantor Neighbour-Joining consensus tree, no outgroup,  
1226 Bootstrap resampling with 1000 replicates, 50% support threshold.

1227

1228 **Supplemental Figure. 8.** Phylogeny of *Arabidopsis* and cowpea histone proteins

1229 Jukes-Cantor Neighbour-Joining consensus tree showing the relationship between the  
1230 *Arabidopsis* and cowpea histones is shown. Histone1 (orange), Histone2 (blue), Histone3  
1231 (green), Histone4 (pink), CenH3 (yellow). A Parameters for tree building were ClustalW MSA  
1232 with BLOSUM cost matrix, Gap open cost 10, Gap extend cost 0.1. Jukes-Cantor Neighbour-  
1233 Joining consensus tree, no outgroup, Bootstrap resampling with 1000 replicates, 50%  
1234 support threshold.

1235

1236

### 1237 **Literature Cited**

1238 ANDERSON, S. N., JOHNSON, C. S., JONES, D. S., CONRAD, L. J., GOU, X., RUSSELL, S. D. &  
1239 SUNDARESAN, V. 2013. Transcriptomes of isolated *Oryza sativa* gametes  
1240 characterized by deep sequencing: evidence for distinct sex-dependent chromatin  
1241 and epigenetic states before fertilization. *Plant J*, 76, 729-41.  
1242 ASHBURNER, M., BALL, C. A., BLAKE, J. A., BOTSTEIN, D., BUTLER, H., CHERRY, J. M., DAVIS,  
1243 A. P., DOLINSKI, K., DWIGHT, S. S., EPPIG, J. T., HARRIS, M. A., HILL, D. P., ISSEL-  
1244 TARVER, L., KASARSKIS, A., LEWIS, S., MATESE, J. C., RICHARDSON, J. E., RINGWALD,  
1245 M., RUBIN, G. M. & SHERLOCK, G. 2000. Gene ontology: tool for the unification of  
1246 biology. The Gene Ontology Consortium. *Nat Genet*, 25, 25-9.  
1247 BARTRINA, I., OTTO, E., STRNAD, M., WERNER, T. & SCHMULLING, T. 2011. Cytokinin  
1248 regulates the activity of reproductive meristems, flower organ size, ovule formation,  
1249 and thus seed yield in *Arabidopsis thaliana*. *Plant Cell*, 23, 69-80.  
1250 BASS, H. W., MARSHALL, W. F., SEDAT, J. W., AGARD, D. A. & CANDE, W. Z. 1997. Telomeres  
1251 cluster de novo before the initiation of synapsis: a three-dimensional spatial analysis  
1252 of telomere positions before and during meiotic prophase. *J Cell Biol*, 137, 5-18.  
1253 BELMONTE, M. F., KIRKBRIDE, R. C., STONE, S. L., PELLETIER, J. M., BUI, A. Q., YEUNG, E. C.,  
1254 HASHIMOTO, M., FEI, J., HARADA, M., MUNOZ, M. D., LE, B. H., DREWS, G. N.,  
1255 BRADY, S. M., GOLDBERG, R. B. & HARADA, J. J. 2013. Comprehensive developmental

- 1256 profiles of gene activity in regions and subregions of the Arabidopsis seed.  
1257 *Proceedings of the National Academy of Sciences of the United States of America*,  
1258 110, E435-E444.
- 1259 BERGER, F., HAMAMURA, Y., INGOUFF, M. & HIGASHIYAMA, T. 2008. Double fertilization -  
1260 caught in the act. *Trends Plant Sci*, 13, 437-43.
- 1261 BORG, M. & BERGER, F. 2015. Chromatin remodelling during male gametophyte  
1262 development. *Plant J*, 83, 177-88.
- 1263 BORGES, F. & MARTIENSSEN, R. A. 2015. The expanding world of small RNAs in plants.  
1264 *Nature Reviews Molecular Cell Biology*, 16, 727-741.
- 1265 BREWBAKER, J. L. 1967. THE DISTRIBUTION AND PHYLOGENETIC SIGNIFICANCE OF  
1266 BINUCLEATE AND TRINUCLEATE POLLEN GRAINS IN THE ANGIOSPERMS. *American*  
1267 *Journal of Botany*, 54, 1069-1083.
- 1268 BREWBAKER, J. L. & KWACK, B. H. 1963. THE ESSENTIAL ROLE OF CALCIUM ION IN POLLEN  
1269 GERMINATION AND POLLEN TUBE GROWTH. *American Journal of Botany*, 50, 859-  
1270 865.
- 1271 BUCHFINK, B., XIE, C. & HUSON, D. H. 2015. Fast and sensitive protein alignment using  
1272 DIAMOND. *Nat Methods*, 12, 59-60.
- 1273 CHEN, J., STRIEDER, N., KROHN, N. G., CYPRYS, P., SPRUNCK, S., ENGELMANN, J. C. &  
1274 DRESSELHAUS, T. 2017. Zygotic Genome Activation Occurs Shortly after Fertilization  
1275 in Maize. *Plant Cell*, 29, 2106-2125.
- 1276 CLOUGH, S. J. & BENT, A. F. 1998. Floral dip: a simplified method for Agrobacterium-  
1277 mediated transformation of Arabidopsis thaliana. *Plant J*, 16, 735-43.
- 1278 CROMER, L., HEYMAN, J., TOUATI, S., HARASHIMA, H., ARAOU, E., GIRARD, C., HORLOW, C.,  
1279 WASSMANN, K., SCHNITTGER, A., DE VEYLDER, L. & MERCIER, R. 2012. OSD1  
1280 promotes meiotic progression via APC/C inhibition and forms a regulatory network  
1281 with TDM and CYCA1;2/TAM. *PLoS Genet*, 8, e1002865.
- 1282 CURTIS, M. D. & GROSSNIKLAUS, U. 2003. A gateway cloning vector set for high-throughput  
1283 functional analysis of genes in planta. *Plant Physiol*, 133, 462-9.
- 1284 DANTE, R. A., LARKINS, B. A. & SABELLI, P. A. 2014. Cell cycle control and seed development.  
1285 *Front Plant Sci*, 5, 493.
- 1286 DE SCHUTTER, K., JOUBES, J., COOLS, T., VERKEST, A., CORELLOU, F., BABIYCHUK, E., VAN  
1287 DER SCHUEREN, E., BEECKMAN, T., KUSHNIR, S., INZE, D. & DE VEYLDER, L. 2007.  
1288 Arabidopsis WEE1 kinase controls cell cycle arrest in response to activation of the  
1289 DNA integrity checkpoint. *Plant Cell*, 19, 211-25.
- 1290 DENG, L., ZHANG, S., WANG, G., FAN, S., LI, M., CHEN, W., TU, B., TAN, J., WANG, Y., MA, B.,  
1291 LI, S. & QIN, P. 2017. Down-Regulation of OsEMF2b Caused Semi-sterility Due to  
1292 Anther and Pollen Development Defects in Rice. *Front Plant Sci*, 8, 1998.
- 1293 FAN, D., WANG, X., TANG, X., YE, X., REN, S., WANG, D. & LUO, K. 2018. Histone H3K9  
1294 demethylase JMJ25 epigenetically modulates anthocyanin biosynthesis in poplar.  
1295 *Plant J*, 96, 1121-1136.
- 1296 FRIEDMAN, W. E. 1999. Expression of the cell cycle in sperm of Arabidopsis: implications for  
1297 understanding patterns of gametogenesis and fertilization in plants and other  
1298 eukaryotes. *Development*, 126, 1065-1075.
- 1299 GARCÍA-AGUILAR, M., DORANTES-ACOSTA, A., PÉREZ-ESPAÑA, V. & VIELLE-CALZADA, J.-P.  
1300 2005. Whole-mount in situ mRNA localization in developing ovules and seeds  
1301 of Arabidopsis. *Plant Molecular Biology Reporter*, 23, 279-289.

- 1302 GIBSON, S. W. & TODD, C. D. 2015. Arabidopsis AIR12 influences root development. *Physiol*  
1303 *Mol Biol Plants*, 21, 479-89.
- 1304 GREEN-ARMYTAGE, P. 2010. A Colour Alphabet and the Limits of Colour Coding. *Colour:*  
1305 *Design & Creativity*, 5, 1-23.
- 1306 GROSSNIKLAUS, U. & PARO, R. 2014. Transcriptional silencing by polycomb-group proteins.  
1307 *Cold Spring Harb Perspect Biol*, 6, a019331.
- 1308 HAERIZADEH, F., WONG, C. E., BHALLA, P. L., GRESSHOFF, P. M. & SINGH, M. B. 2009.  
1309 Genomic expression profiling of mature soybean (*Glycine max*) pollen. *BMC Plant*  
1310 *Biol*, 9, 25.
- 1311 HAGA, N., KOBAYASHI, K., SUZUKI, T., MAEO, K., KUBO, M., OHTANI, M., MITSUDA, N.,  
1312 DEMURA, T., NAKAMURA, K., JURGENS, G. & ITO, M. 2011. Mutations in MYB3R1  
1313 and MYB3R4 cause pleiotropic developmental defects and preferential down-  
1314 regulation of multiple G2/M-specific genes in Arabidopsis. *Plant Physiol*, 157, 706-17.
- 1315 HANDS, P., RABIGER, D. S. & KOLTUNOW, A. 2016. Mechanisms of endosperm initiation.  
1316 *Plant Reprod*, 29, 215-25.
- 1317 HUANG, K. L., MA, G. J., ZHANG, M. L., XIONG, H., WU, H., ZHAO, C. Z., LIU, C. S., JIA, H. X.,  
1318 CHEN, L., KJORVEN, J. O., LI, X. B. & REN, F. 2018. The ARF7 and ARF19 Transcription  
1319 Factors Positively Regulate PHOSPHATE STARVATION RESPONSE1 in Arabidopsis  
1320 Roots. *Plant Physiol*, 178, 413-427.
- 1321 IBARRA, C. A., FENG, X., SCHOFT, V. K., HSIEH, T. F., UZAWA, R., RODRIGUES, J. A., ZEMACH,  
1322 A., CHUMAK, N., MACHLICOVA, A., NISHIMURA, T., ROJAS, D., FISCHER, R. L.,  
1323 TAMARU, H. & ZILBERMAN, D. 2012. Active DNA demethylation in plant companion  
1324 cells reinforces transposon methylation in gametes. *Science*, 337, 1360-1364.
- 1325 JACKSON, D. 1992. In-Situ Hybridization in Plants. *In: GURR, S. J., MCPHERSON, M. J. &*  
1326 *BOWLES, D. J. (eds.) Molecular Plant Pathology: A Practical Approach Oxford*  
1327 *University Press.*
- 1328 JURANIC, M., TUCKER, M. R., SCHULTZ, C. J., SHIRLEY, N. J., TAYLOR, J. M., SPRIGGS, A.,  
1329 JOHNSON, S. D., BULONE, V. & KOLTUNOW, A. M. 2018. Asexual Female  
1330 Gametogenesis Involves Contact with a Sexually-Fated Megaspore in Apomictic  
1331 Hieracium. *Plant Physiol*, 177, 1027-1049.
- 1332 KAWASHIMA, T. & BERGER, F. 2014. Epigenetic reprogramming in plant sexual reproduction.  
1333 *Nat Rev Genet*, 15, 613-24.
- 1334 KIM, T. W., HWANG, J. Y., KIM, Y. S., JOO, S. H., CHANG, S. C., LEE, J. S., TAKATSUTO, S. &  
1335 KIM, S. K. 2005. Arabidopsis CYP85A2, a cytochrome P450, mediates the Baeyer-  
1336 Villiger oxidation of castasterone to brassinolide in brassinosteroid biosynthesis.  
1337 *Plant Cell*, 17, 2397-412.
- 1338 KLEPIKOVA, A. V., KASIANOV, A. S., GERASIMOV, E. S., LOGACHEVA, M. D. & PENIN, A. A.  
1339 2016. A high resolution map of the Arabidopsis thaliana developmental  
1340 transcriptome based on RNA-seq profiling. *Plant J*, 88, 1058-1070.
- 1341 KOBAYASHI, K., SUZUKI, T., IWATA, E., MAGYAR, Z., BOGRE, L. & ITO, M. 2015. MYB3Rs,  
1342 plant homologs of Myb oncoproteins, control cell cycle-regulated transcription and  
1343 form DREAM-like complexes. *Transcription*, 6, 106-11.
- 1344 KOMAKI, S. & SUGIMOTO, K. 2012. Control of the plant cell cycle by developmental and  
1345 environmental cues. *Plant Cell Physiol*, 53, 953-64.
- 1346 KOSZEGI, D., JOHNSTON, A. J., RUTTEN, T., CZIHAL, A., ALTSCHMIED, L., KUMLEHN, J., WUST,  
1347 S. E., KIRIOUKHOVA, O., GHEYSELINCK, J., GROSSNIKLAUS, U. & BAUMLEIN, H. 2011.

- 1348 Members of the RKD transcription factor family induce an egg cell-like gene  
1349 expression program. *Plant J*, 67, 280-91.
- 1350 KUBO, T., FUJITA, M., TAKAHASHI, H., NAKAZONO, M., TSUTSUMI, N. & KURATA, N. 2013.  
1351 Transcriptome analysis of developing ovules in rice isolated by laser microdissection.  
1352 *Plant Cell Physiol*, 54, 750-65.
- 1353 LAWIT, S. J., CHAMBERLIN, M. A., AGEE, A., CASWELL, E. S. & ALBERTSEN, M. C. 2013.  
1354 Transgenic manipulation of plant embryo sacs tracked through cell-type-specific  
1355 fluorescent markers: cell labeling, cell ablation, and adventitious embryos. *Plant*  
1356 *Reproduction*, 26, 125-137.
- 1357 LI, L., ZHAO, Y. F., MCCAIG, B. C., WINGERD, B. A., WANG, J. H., WHALON, M. E., PICHESKY,  
1358 E. & HOWE, G. A. 2004. The tomato homolog of CORONATINE-INSENSITIVE1 is  
1359 required for the maternal control of seed maturation, jasmonate-signaled defense  
1360 responses, and glandular trichome development (vol 16, pg 126, 2004). *Plant Cell*,  
1361 16, 783-783.
- 1362 LITUIEV, D. S., KROHN, N. G., MULLER, B., JACKSON, D., HELLRIEGEL, B., DRESSELHAUS, T. &  
1363 GROSSNIKLAUS, U. 2013. Theoretical and experimental evidence indicates that there  
1364 is no detectable auxin gradient in the angiosperm female gametophyte.  
1365 *Development*, 140, 4544-4553.
- 1366 LIU, P., ZHANG, S., ZHOU, B., LUO, X., ZHOU, X. F., CAI, B., JIN, Y. H., NIU, LIN, J., CAO, X. &  
1367 JIN, J. B. 2019. The Histone H3K4 Demethylase JMJ16 Represses Leaf Senescence in  
1368 Arabidopsis. *Plant Cell*, 31, 430-443.
- 1369 LONARDI, S., MUNOZ-AMATRIAIN, M., LIANG, Q., SHU, S., WANAMAKER, S. I., LO, S.,  
1370 TANSKANEN, J., SCHULMAN, A. H., ZHU, T., LUO, M. C., ALHAKAMI, H., OUNIT, R.,  
1371 HASAN, A. M., VERDIER, J., ROBERTS, P. A., SANTOS, J. R. P., NDEVE, A., DOLEZEL, J.,  
1372 VRANA, J., HOKIN, S. A., FARMER, A. D., CANNON, S. B. & CLOSE, T. J. 2019. The  
1373 genome of cowpea (*Vigna unguiculata* [L.] Walp.). *Plant J*, 98, 767-782.
- 1374 LOVE, M. I., HUBER, W. & ANDERS, S. 2014. Moderated estimation of fold change and  
1375 dispersion for RNA-seq data with DESeq2. *Genome Biol*, 15, 550.
- 1376 MA, C. & WANG, X. 2012. Application of the Gini correlation coefficient to infer regulatory  
1377 relationships in transcriptome analysis. *Plant Physiol*, 160, 192-203.
- 1378 MARTINEZ, G., PANDA, K., KOHLER, C. & SLOTKIN, R. K. 2016. Silencing in sperm cells is  
1379 directed by RNA movement from the surrounding nurse cell. *Nat Plants*, 2, 16030.
- 1380 MOGENSEN, H. L. & HOLM, P. B. 1995. Dynamics of Nuclear-DNA Quantities during Zygote  
1381 Development in Barley. *Plant Cell*, 7, 487-494.
- 1382 MOZGOVA, I. & HENNIG, L. 2015. The polycomb group protein regulatory network. *Annu*  
1383 *Rev Plant Biol*, 66, 269-96.
- 1384 MUNOZ-AMATRIAIN, M., MIREBRAHIM, H., XU, P., WANAMAKER, S. I., LUO, M., ALHAKAMI,  
1385 H., ALPERT, M., ATOKPLE, I., BATIENO, B. J., BOUKAR, O., BOZDAG, S., CISSE, N.,  
1386 DRABO, I., EHLERS, J. D., FARMER, A., FATOKUN, C., GU, Y. Q., GUO, Y. N., HUYNH, B.  
1387 L., JACKSON, S. A., KUSI, F., LAWLEY, C. T., LUCAS, M. R., MA, Y., TIMKO, M. P., WU, J.,  
1388 YOU, F., BARKLEY, N. A., ROBERTS, P. A., LONARDI, S. & CLOSE, T. J. 2017. Genome  
1389 resources for climate-resilient cowpea, an essential crop for food security. *Plant J*,  
1390 89, 1042-1054.
- 1391 OKADA, T., HU, Y. K., TUCKER, M. R., TAYLOR, J. M., JOHNSON, S. D., SPRIGGS, A., TSUCHIYA,  
1392 T., OELKERS, K., RODRIGUES, J. C. M. & KOLTUNOW, A. M. G. 2013. Enlarging Cells  
1393 Initiating Apomixis in *Hieracium praealtum* Transition to an Embryo Sac Program  
1394 prior to Entering Mitosis. *Plant Physiology*, 163, 216-231.

- 1395 OLMEDO-MONFIL, V., DURAN-FIGUEROA, N., ARTEAGA-VAZQUEZ, M., DEMESA-AREVALO,  
1396 E., AUTRAN, D., GRIMANELLI, D., SLOTKIN, R. K., MARTIENSSEN, R. A. & VIELLE-  
1397 CALZADA, J. P. 2010. Control of female gamete formation by a small RNA pathway in  
1398 Arabidopsis. *Nature*, 464, 628-32.
- 1399 PAGNUSSAT, G. C., ALANDETE-SAEZ, M., BOWMAN, J. L. & SUNDARESAN, V. 2009. Auxin-  
1400 Dependent Patterning and Gamete Specification in the Arabidopsis Female  
1401 Gametophyte. *Science*, 324, 1684-1689.
- 1402 PANOLI, A., MARTIN, M. V., ALANDETE-SAEZ, M., SIMON, M., NEFF, C., SWARUP, R.,  
1403 BELLIDO, A., YUAN, L., PAGNUSSAT, G. C. & SUNDARESAN, V. 2015. Auxin Import and  
1404 Local Auxin Biosynthesis Are Required for Mitotic Divisions, Cell Expansion and Cell  
1405 Specification during Female Gametophyte Development in Arabidopsis thaliana. *PLoS*  
1406 *One*, 10.
- 1407 PAYNE, T., JOHNSON, S. D. & KOLTUNOW, A. M. 2004. KNUCKLES (KNU) encodes a C2H2  
1408 zinc-finger protein that regulates development of basal pattern elements of the  
1409 Arabidopsis gynoecium. *Development*, 131, 3737-49.
- 1410 PEGLER, J. L., OULTRAM, J. M. J., GROF, C. P. L. & EAMENS, A. L. 2019. Profiling the Abiotic  
1411 Stress Responsive microRNA Landscape of Arabidopsis thaliana. *Plants (Basel)*, 8.
- 1412 PENTERMAN, J., ZILBERMAN, D., HUH, J. H., BALLINGER, T., HENIKOFF, S. & FISCHER, R. L.  
1413 2007. DNA demethylation in the Arabidopsis genome. *Proceedings of the National*  
1414 *Academy of Sciences of the United States of America*, 104, 6752-6757.
- 1415 PIEN, S. & GROSSNIKLAUS, U. 2007. Polycomb group and trithorax group proteins in  
1416 Arabidopsis. *Biochim Biophys Acta*, 1769, 375-82.
- 1417 PILLOT, M., AUTRAN, D., LEBLANC, O. & GRIMANELLI, D. 2010. A role for  
1418 CHROMOMETHYLASE3 in mediating transposon and euchromatin silencing during  
1419 egg cell reprogramming in Arabidopsis. *Plant Signal Behav*, 5, 1167-70.
- 1420 POPELKA, J. C., GOLLASCH, S., MOORE, A., MOLVIG, L. & HIGGINS, T. J. V. 2006. Genetic  
1421 transformation of cowpea (*Vigna unguiculata* L.) and stable transmission of the  
1422 transgenes to progeny. *Plant Cell Reports*, 25, 304-312.
- 1423 RAMAKERS, C., RUIJTER, J. M., DEPREZ, R. H. L. & MOORMAN, A. F. M. 2003. Assumption-  
1424 free analysis of quantitative real-time polymerase chain reaction (PCR) data.  
1425 *Neuroscience Letters*, 339, 62-66.
- 1426 RAY, S., AGARWAL, P., ARORA, R., KAPOOR, S. & TYAGI, A. K. 2007. Expression analysis of  
1427 calcium-dependent protein kinase gene family during reproductive development and  
1428 abiotic stress conditions in rice (*Oryza sativa* L. ssp. indica). *Mol Genet Genomics*,  
1429 278, 493-505.
- 1430 RUIJTER, J. M., RAMAKERS, C., HOOGAARS, W. M. H., KARLEN, Y., BAKKER, O., VAN DEN  
1431 HOFF, M. J. B. & MOORMAN, A. F. M. 2009. Amplification efficiency: linking baseline  
1432 and bias in the analysis of quantitative PCR data. *Nucleic Acids Research*, 37.
- 1433 RUTLEY, N. & TWELL, D. 2015. A decade of pollen transcriptomics. *Plant Reproduction*, 28,  
1434 73-89.
- 1435 SALINAS-GAMBOA, R., JOHNSON, S. D., SANCHEZ-LEON, N., KOLTUNOW, A. M. G. & VIELLE-  
1436 CALZADA, J. P. 2016. New observations on gametogenic development and  
1437 reproductive experimental tools to support seed yield improvement in cowpea  
1438 [*Vigna unguiculata* (L.) Walp.]. *Plant Reproduction*, 29, 165-177.
- 1439 SCHMIDT, A., WUEST, S. E., VIJVERBERG, K., BAROUX, C., KLEEN, D. & GROSSNIKLAUS, U.  
1440 2011. Transcriptome analysis of the Arabidopsis megaspore mother cell uncovers the

- 1441 importance of RNA helicases for plant germline development. *PLoS Biol*, 9,  
1442 e1001155.
- 1443 SCHOFT, V. K., CHUMAK, N., CHOI, Y., HANNON, M., GARCIA-AGUILAR, M., MACHLICOVA, A.,  
1444 SLUSARZ, L., MOSIOLEK, M., PARK, J. S., PARK, G. T., FISCHER, R. L. & TAMARU, H.  
1445 2011. Function of the DEMETER DNA glycosylase in the Arabidopsis thaliana male  
1446 gametophyte. *Proc Natl Acad Sci U S A*, 108, 8042-7.
- 1447 SCOFIELD, S., JONES, A. & MURRAY, J. A. 2014. The plant cell cycle in context. *J Exp Bot*, 65,  
1448 2557-62.
- 1449 SHERMOEN, A. W. & O'FARRELL, P. H. 1991. Progression of the Cell-Cycle through Mitosis  
1450 Leads to Abortion of Nascent Transcripts. *Cell*, 67, 303-310.
- 1451 SINGH, B. B. 2014. Cowpea: The Food Legume of the 21st Century. *Cowpea: The Food*  
1452 *Legume of the 21st Century*, 1-170.
- 1453 SLOTKIN, R. K., VAUGHN, M., BORGES, F., TANURDZIC, M., BECKER, J. D., FEIJO, J. A. &  
1454 MARTIENSSEN, R. A. 2009. Epigenetic reprogramming and small RNA silencing of  
1455 transposable elements in pollen. *Cell*, 136, 461-72.
- 1456 SORNAY, E., FORZANI, C., FORERO-VARGAS, M., DEWITTE, W. & MURRAY, J. A. 2015.  
1457 Activation of CYCD7;1 in the central cell and early endosperm overcomes cell-cycle  
1458 arrest in the Arabidopsis female gametophyte, and promotes early endosperm and  
1459 embryo development. *Plant J*, 84, 41-55.
- 1460 SPRIGGS, A., HENDERSON, S. T., HAND, M. L., JOHNSON, S. D., TAYLOR, J. M. & KOLTUNOW,  
1461 A. 2018. Assembled genomic and tissue-specific transcriptomic data resources for  
1462 two genetically distinct lines of Cowpea ( *Vigna unguiculata* (L.) Walp). *Gates Open*  
1463 *Res*, 2, 7.
- 1464 SPRUNCK, S., RADEMACHER, S., VOGLER, F., GHEYSELINCK, J., GROSSNIKLAUS, U. &  
1465 DRESSELHAUS, T. 2012. Egg cell-secreted EC1 triggers sperm cell activation during  
1466 double fertilization. *Science*, 338, 1093-7.
- 1467 STANKE, M. & WAACK, S. 2003. Gene prediction with a hidden Markov model and a new  
1468 intron submodel. *Bioinformatics*, 19 Suppl 2, ii215-25.
- 1469 STEFFEN, J. G., KANG, I. H., MACFARLANE, J. & DREWS, G. N. 2007. Identification of genes  
1470 expressed in the Arabidopsis female gametophyte. *Plant J*, 51, 281-92.
- 1471 SUKAWA, Y. & OKAMOTO, T. 2018. Cell cycle in egg cell and its progression during zygotic  
1472 development in rice. *Plant Reprod*, 31, 107-116.
- 1473 SUN, Q. & ZHOU, D. X. 2008. Rice jmjC domain-containing gene JMJ706 encodes H3K9  
1474 demethylase required for floral organ development. *Proc Natl Acad Sci U S A*, 105,  
1475 13679-84.
- 1476 TALBERT, P. B., AHMAD, K., ALMOUZNI, G., AUSIO, J., BERGER, F., BHALLA, P. L., BONNER, W.  
1477 M., CANDE, W. Z., CHADWICK, B. P., CHAN, S. W. L., CROSS, G. A. M., CUI, L. W.,  
1478 DIMITROV, S. I., DOENECKE, D., EIRIN-LOPEZ, J. M., GOROVSKY, M. A., HAKE, S. B.,  
1479 HAMKALO, B. A., HOLEC, S., JACOBSEN, S. E., KAMIENIARZ, K., KHOCHBIN, S.,  
1480 LADURNER, A. G., LANDSMAN, D., LATHAM, J. A., LOPPIN, B., MALIK, H. S.,  
1481 MARZLUFF, W. F., PEHRSON, J. R., POSTBERG, J., SCHNEIDER, R., SINGH, M. B.,  
1482 SMITH, M. M., THOMPSON, E., TORRES-PADILLA, M. E., TREMETHICK, D. J., TURNER,  
1483 B. M., WATERBORG, J. H., WOLLMANN, H., YELAGANDULA, R., ZHU, B. & HENIKOFF,  
1484 S. 2012. A unified phylogeny-based nomenclature for histone variants. *Epigenetics &*  
1485 *Chromatin*, 5.
- 1486 THE GENE ONTOLOGY, C. 2017. Expansion of the Gene Ontology knowledgebase and  
1487 resources. *Nucleic Acids Res*, 45, D331-D338.

- 1488 TUCKER, M. R., OKADA, T., HU, Y., SCHOLEFIELD, A., TAYLOR, J. M. & KOLTUNOW, A. M.  
1489 2012. Somatic small RNA pathways promote the mitotic events of  
1490 megagametogenesis during female reproductive development in Arabidopsis.  
1491 *Development*, 139, 1399-404.
- 1492 VELAPPAN, Y., SIGNORELLI, S. & CONSIDINE, M. J. 2017. Cell cycle arrest in plants: what  
1493 distinguishes quiescence, dormancy and differentiated G1? *Ann Bot*, 120, 495-509.
- 1494 VIELLE-CALZADA, J. P., BASKAR, R. & GROSSNIKLAUS, U. 2000. Delayed activation of the  
1495 paternal genome during seed development. *Nature*, 404, 91-4.
- 1496 VIELLE-CALZADA, J. P., THOMAS, J., SPILLANE, C., COLUCCIO, A., HOEPPNER, M. A. &  
1497 GROSSNIKLAUS, U. 1999. Maintenance of genomic imprinting at the Arabidopsis  
1498 medea locus requires zygotic DDM1 activity. *Genes & Development*, 13, 2971-2982.
- 1499 WANG, G. & KOHLER, C. 2017. Epigenetic processes in flowering plant reproduction. *J Exp*  
1500 *Bot*, 68, 797-807.
- 1501 WANG, G., KONG, H., SUN, Y., ZHANG, X., ZHANG, W., ALTMAN, N., DEPAMPHILIS, C. W. &  
1502 MA, H. 2004. Genome-wide analysis of the cyclin family in Arabidopsis and  
1503 comparative phylogenetic analysis of plant cyclin-like proteins. *Plant Physiol*, 135,  
1504 1084-99.
- 1505 WANG, R. & ESTELLE, M. 2014. Diversity and specificity: auxin perception and signaling  
1506 through the TIR1/AFB pathway. *Curr Opin Plant Biol*, 21, 51-58.
- 1507 WILLIAMS, J. H., TAYLOR, M. L. & O'MEARA, B. C. 2014. Repeated evolution of tricellular  
1508 (and bicellular) pollen. *Am J Bot*, 101, 559-71.
- 1509 WOJCIECHOWSKI, M. F., LAVIN, M. & SANDERSON, M. J. 2004. A phylogeny of legumes  
1510 (Leguminosae) based on analysis of the plastid matK gene resolves many well-  
1511 supported subclades within the family. *Am J Bot*, 91, 1846-62.
- 1512 WUEST, S. E., VIJVERBERG, K., SCHMIDT, A., WEISS, M., GHEYSELINCK, J., LOHR, M.,  
1513 WELLMER, F., RAHNENFUHRER, J., VON MERING, C. & GROSSNIKLAUS, U. 2010.  
1514 Arabidopsis female gametophyte gene expression map reveals similarities between  
1515 plant and animal gametes. *Curr Biol*, 20, 506-12.
- 1516 YAO, S., JIANG, C., HUANG, Z., TORRES-JEREZ, I., CHANG, J., ZHANG, H., UDVARDI, M., LIU, R.  
1517 & VERDIER, J. 2016. The *Vigna unguiculata* Gene Expression Atlas (VuGEA) from de  
1518 novo assembly and quantification of RNA-seq data provides insights into seed  
1519 maturation mechanisms. *Plant J*, 88, 318-327.
- 1520 YAO, X., TIAN, L., YANG, J., ZHAO, Y. N., ZHU, Y. X., DAI, X., ZHAO, Y. & YANG, Z. N. 2018.  
1521 Auxin production in diploid microsporocytes is necessary and sufficient for early  
1522 stages of pollen development. *PLoS Genet*, 14, e1007397.
- 1523 ZHAN, J. P., THAKARE, D., MA, C., LLOYD, A., NIXON, N. M., ARAKAKI, A. M., BURNETT, W. J.,  
1524 LOGAN, K. O., WANG, D. F., WANG, X. F., DREWS, G. N. & YADEGARIA, R. 2015. RNA  
1525 Sequencing of Laser-Capture Microdissected Compartments of the Maize Kernel  
1526 Identifies Regulatory Modules Associated with Endosperm Cell Differentiation. *Plant*  
1527 *Cell*, 27, 513-531.
- 1528

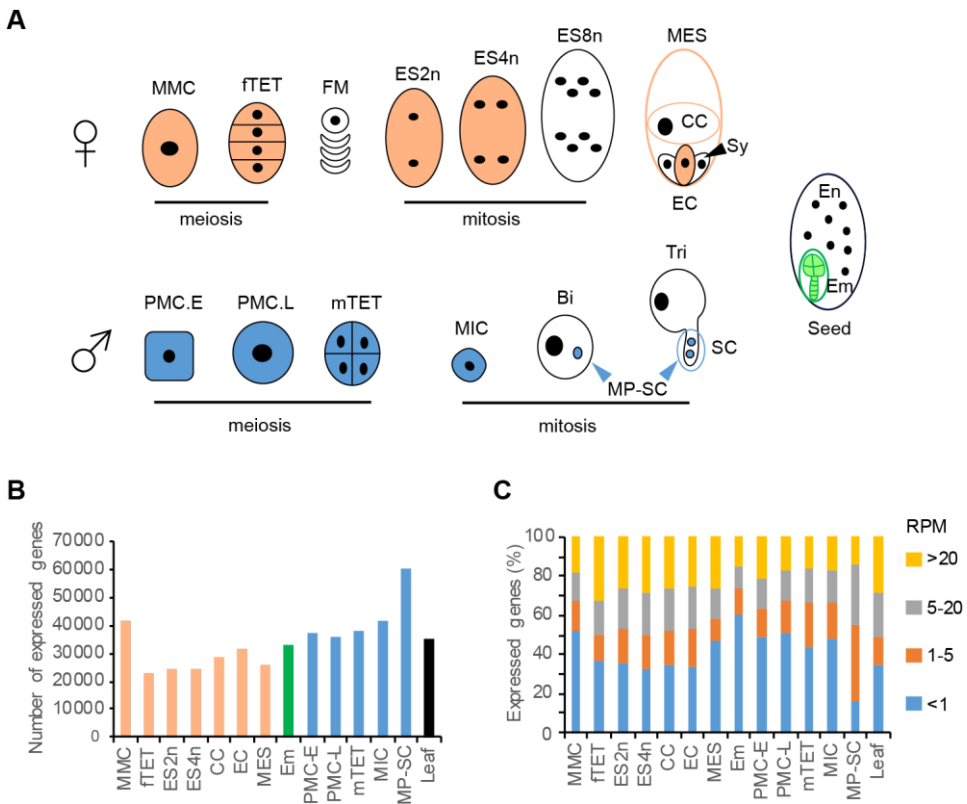

**Figure 1.** Stages of reproductive development in cowpea and gene expression in developed transcriptomes.

A, Cartoon of temporal stages of male and female gametophyte development showing cell-type stages collected by LCM for RNAseq. For detail refer to text. B, The number of genes expressed in each transcriptome set (RPM > 0). C, The proportion of genes expressed at very low (<1RPM), low (1-5RPM), moderate (5-20RPM) or high (>20RPM) levels in RNAseq sets.

Abbreviations: MMC, megaspore mother cell; fTET, female tetrads; FM, functional megaspore selection stage (not collected); ES2n, mitotic embryo sac with 2 nuclei; ES4n, embryo sac with 4 nuclei; MES, mature embryo sac at anthesis, where antipodals have degenerated, containing the egg cell (EC), flanking synergids (Sy, not collected), and central cell (CC); Em, embryo; En, endosperm (not collected); PMC.E, early pollen mother cell; PMC.L, late pollen mother cell; mTET, male tetrads; MIC, uninucleate microspore; Bi, bicellular pollen stage; Tri, tricellular pollen stage, two sperm cells (SC) in the emerging pollen tube; MP-SC, mature pollen-sperm cell.



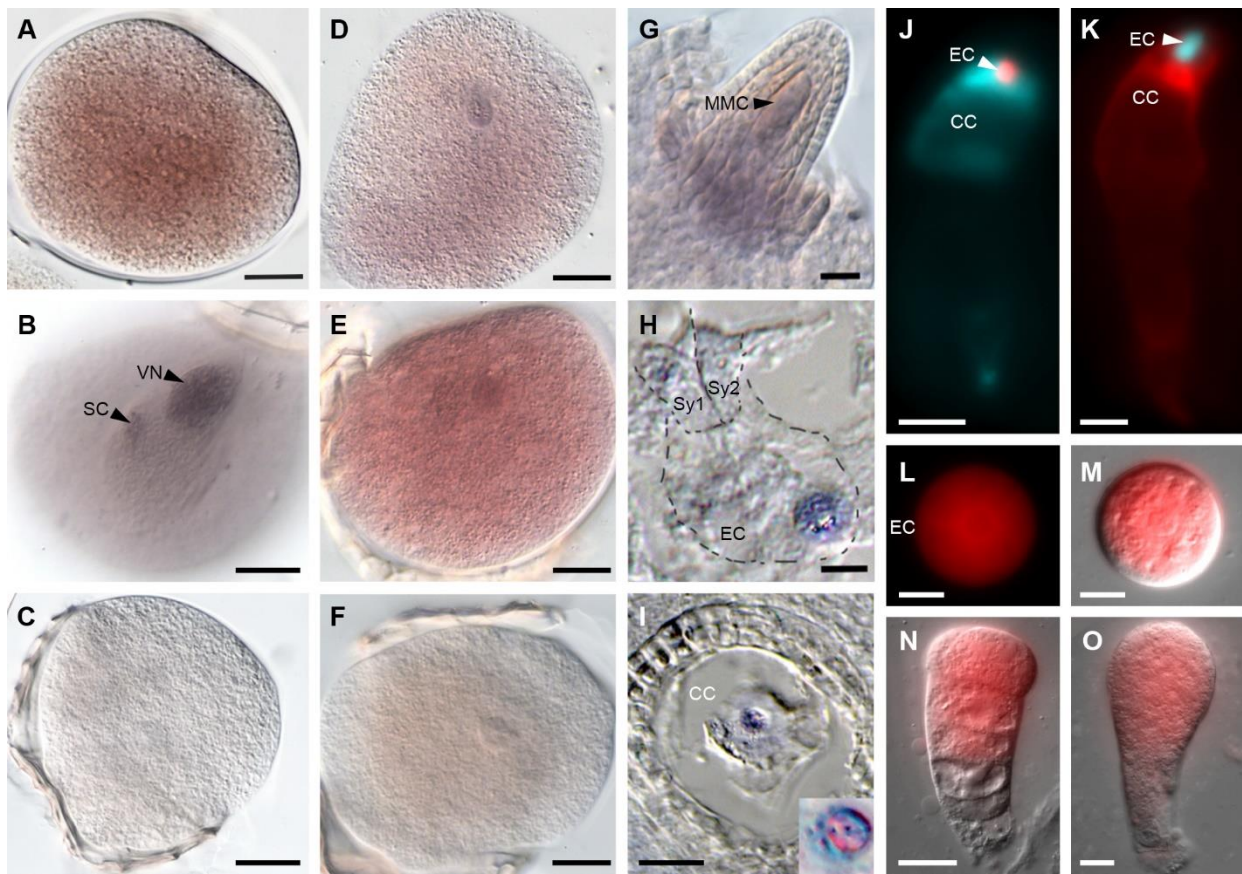

**Figure 2.** Gene expression in cowpea reproductive cell-types.

A – J, Whole-mount *in situ* hybridization (WISH) in pollen grains of cowpea using four different antisense probes. A-C, *VuXTH6* mRNA in sperm cells A and vegetative nucleus B, with no signal in the sense control C. D and E, *VuXTH32* was detected in sperm cell and vegetative cell cytoplasm. F, *VuXTH32* sense controls. G, Whole-mount ovule undergoing megasporogenesis showing *VuKNU1* mRNA localized in the MMC, the nucellus and the initial inner integument. H, Paraffin section through a differentiated female gametophyte showing *VuRKD1* mRNA localization in the egg cell and synergids. I, Paraffin section through a differentiated female gametophyte showing *VuNB-ARC* mRNA localization in the central cell. Inset shows fused polar nuclei showing active transcription of *VuNB-ARC*. J, *AtRKD2<sub>pro</sub>:dsRED-Express* (red) in EC and *AtDD9<sub>pro</sub>:AmCyan1* (cyan) in CC one day before anthesis. K, *AtEC1.1<sub>pro</sub>:AmCyan1* (cyan) in EC and *AtDD25<sub>pro</sub>:dsRED-Express* (red) in CC. L-M, *AtDD45<sub>pro</sub>:dsRED-Express* (red) in isolated egg cell, N, two-celled proembryo and O, early embryo.

Abbreviations: EC, egg cell; CC, central cell; Sy, synergids; SC, sperm cells; VN, vegetative nucleus, MMC, megaspore mother cell.

Scale bars: A-G, L-M = 10  $\mu$ m, H = 8  $\mu$ m, I = 14  $\mu$ m, J-K = 50  $\mu$ m, N-O = 20  $\mu$ m.

**A**

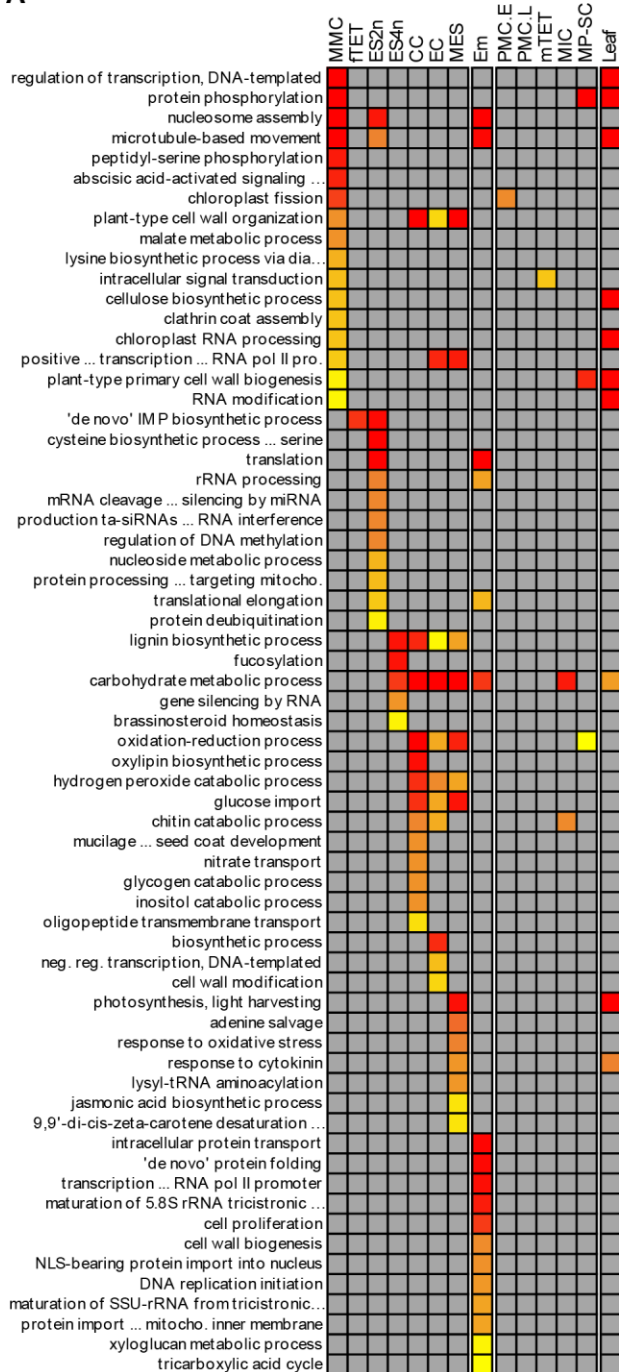

**B**

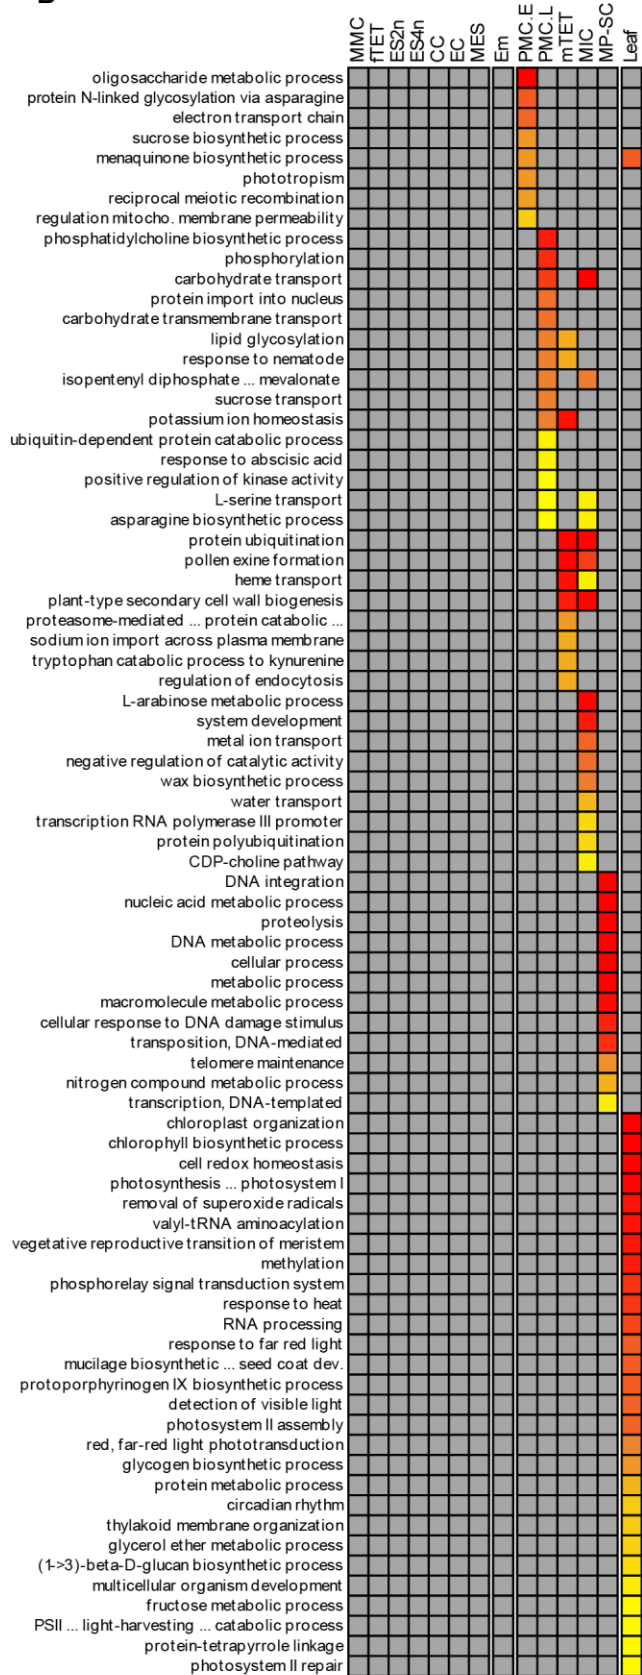

**C**

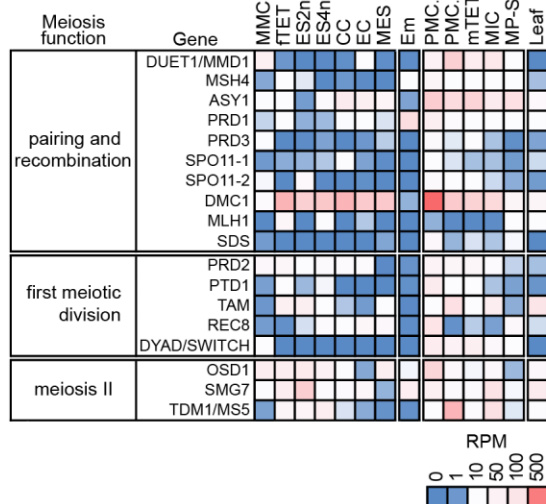

Weighted  
Fisher p value  
1E-10  
1E-5  
1E-4  
0.005  
0.01

**Figure 3.** Differentially enriched Biological Process GO terms and expression of meiosis genes during gametogenesis.

A, Enriched GO terms primarily in female gametophyte and early embryo transcriptomes. B, Enriched GO terms primarily in the male gametophyte and leaf transcriptomes. The statistical significance of the GO enrichment is represented according to the scale of weighted Fisher p value shown at the bottom right. C, Expression of genes involved in meiosis in the generated cowpea transcriptomes (see also Supplemental Tables 7 and 8). Expression levels relate to the RPM scale.

A

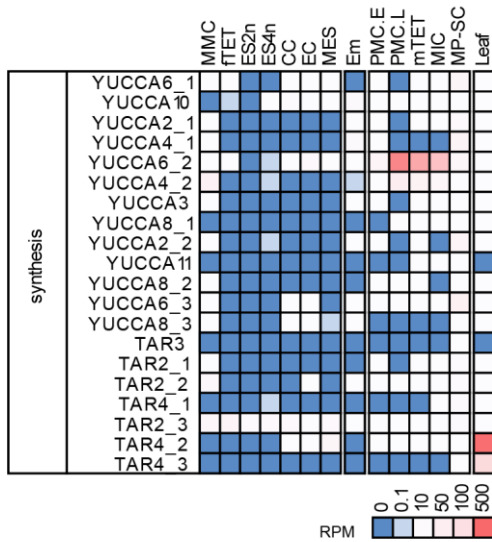

**Figure 4.** Expression of auxin biosynthesis and auxin responsive genes during meiosis and gametophyte development.

A, Expression of genes belonging to the YUCCA and TAR auxin biosynthesis gene families. B, Expression of 60 auxin responsive genes sorted in decreasing order of expression level in the 2-nucleate embryo sac. Expression levels are related to the RPM scale with each respective panel (see also Supplemental Table 9).

B

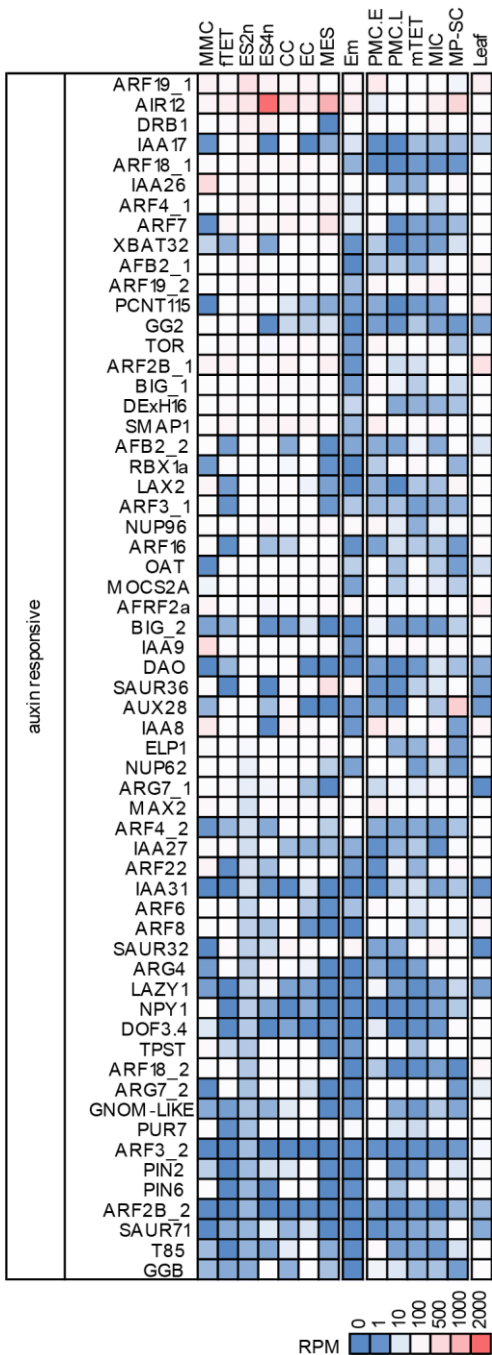



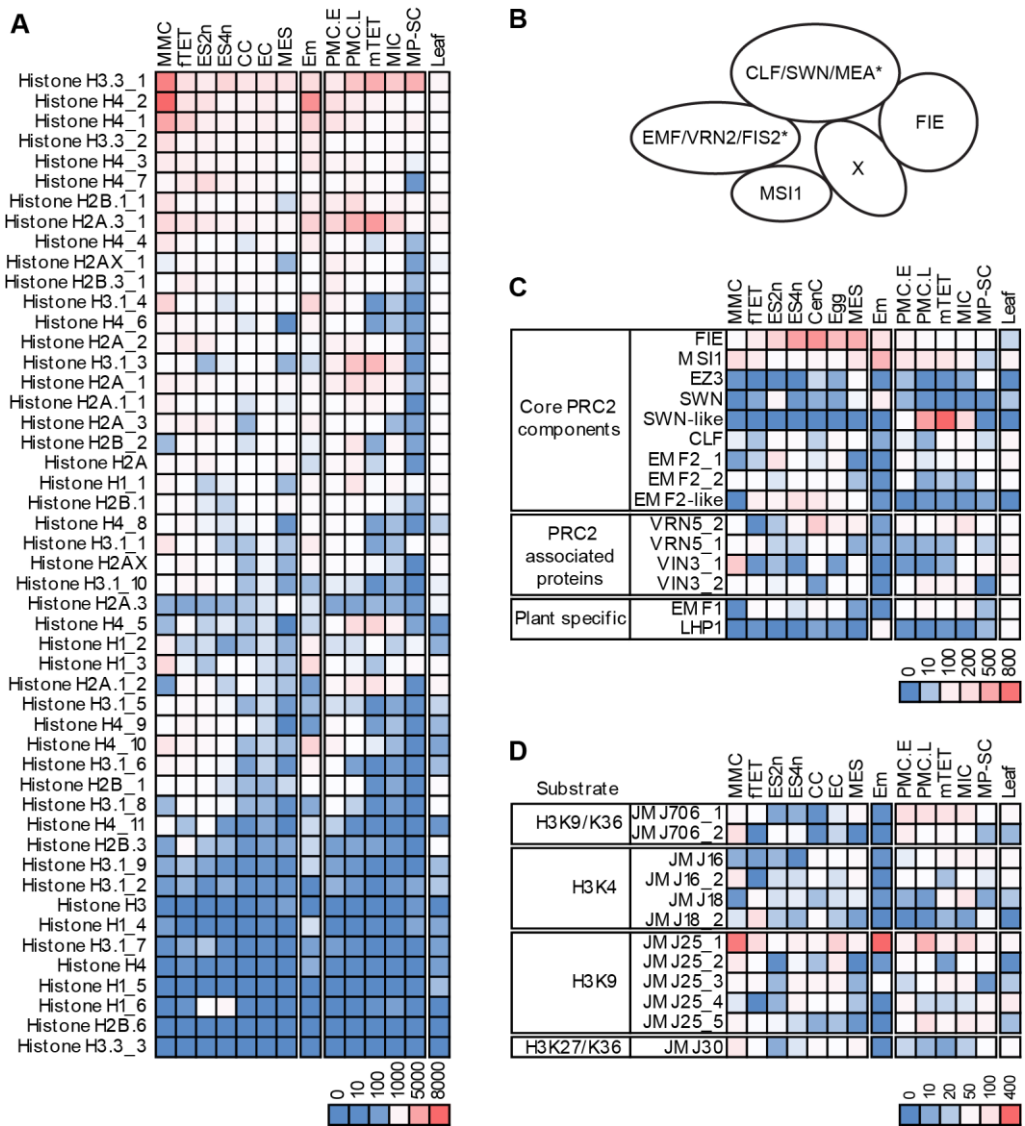

**Figure 6.** Histone gene expression and the expression of selected genes involved in histone modification.

A, Expression of genes belonging to the core histone family (see Supplemental Table 18). B, Expression of selected PcG genes involved in histone methylation resulting in gene silencing (see Supplemental Table 19). C, Known protein interactions forming Polycomb-group repressive 2 complex types. Accessory proteins (X) are often associated with PRC2 complex function. Asterisks indicate *Arabidopsis* specific proteins. MEA and *Arabidopsis* counterparts, SWN and CLF are SET domain protein and homologs of *Drosophila* Enhancer of Zeste. FIS2 and others listed are VEFS-box proteins. FIE and MSI1 are WD40 repeat protein containing proteins (Mozgova and Henning, 2015). D, Expression of selected JMJ family histone demethylase genes and demethylation targets, at left (see also Supplemental Tables 14, 15, 16). Expression levels relate to the RPM scales associated with each panel.

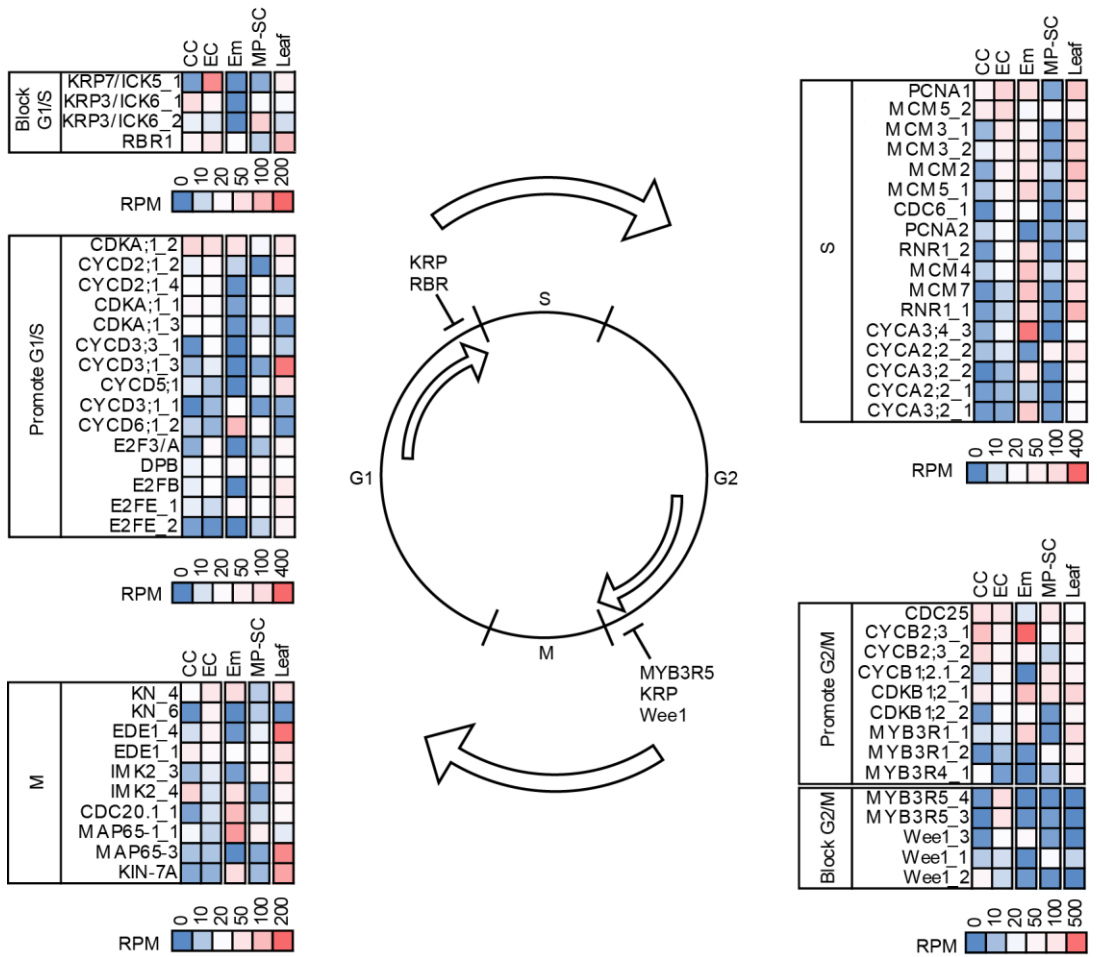

**Figure 7.** Expression of selected cell cycle genes in egg, central cell, mature pollen-sperm and leaf transcriptomes.

Cell cycle genes are grouped according to their function in the cell cycle relating to roles in promoting or blocking progression through various cell cycle phases. Relative expression level is indicated according to the RPM scale shown at the bottom of each panel (see also Supplemental Tables 10 and 11).

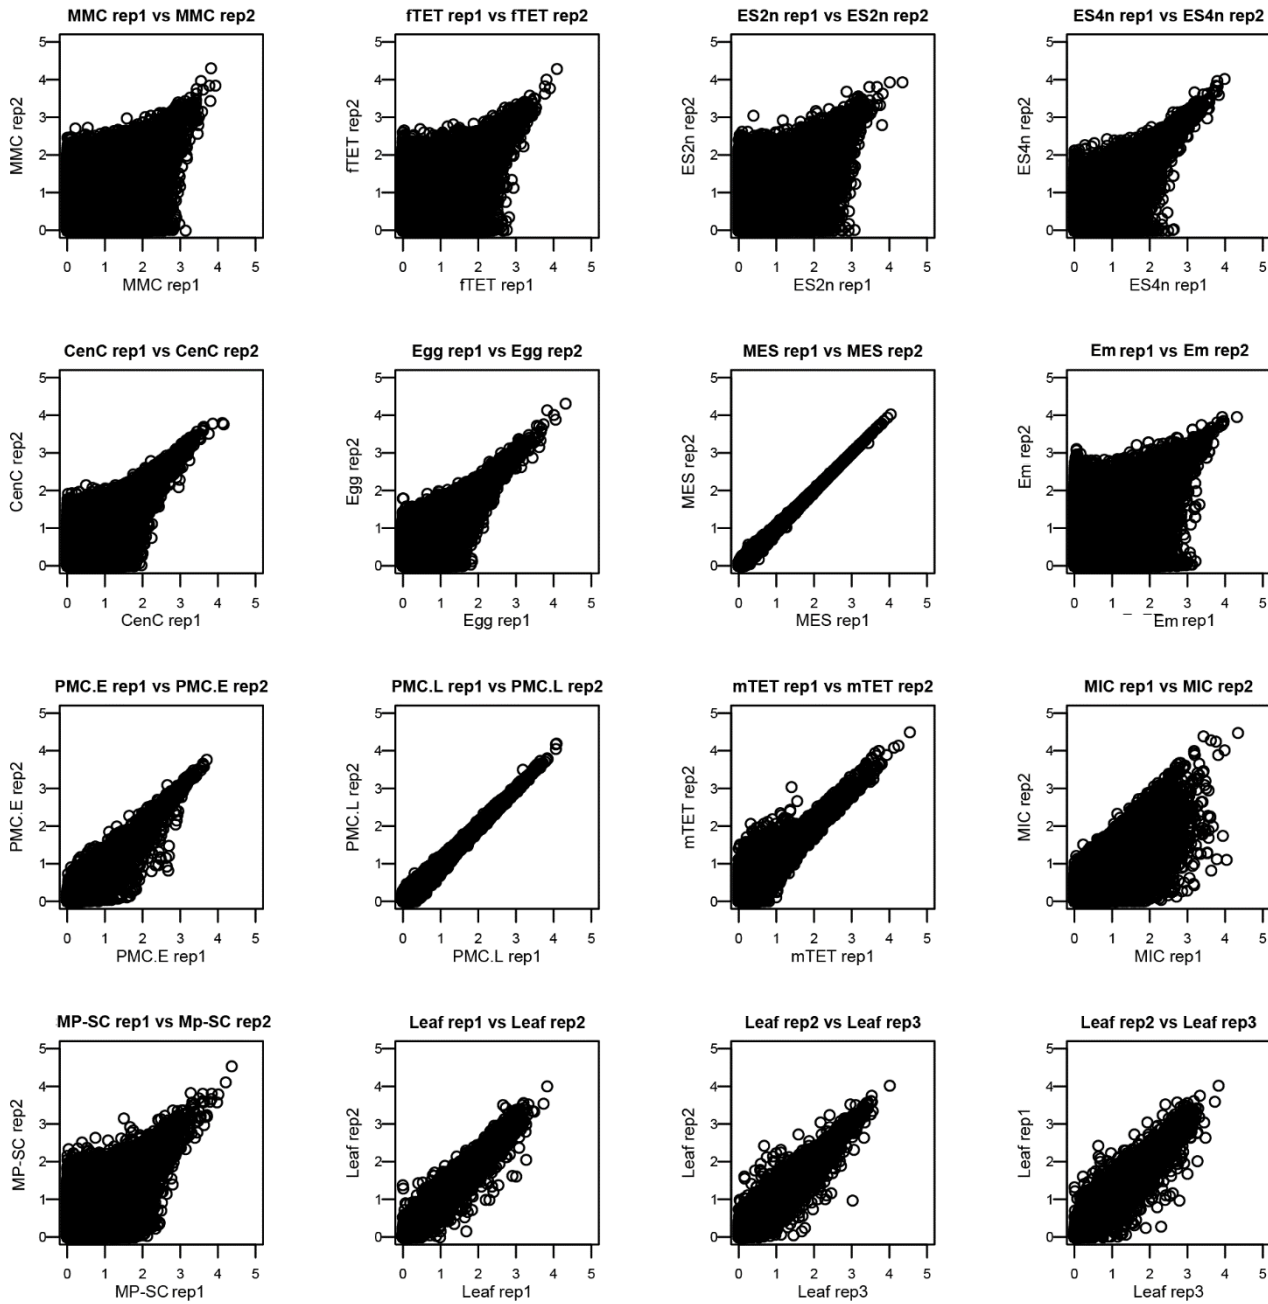

**Supplemental Figure 1.** Correlation between RNAseq replicates.

Scatter plot of log-transformed mean RPM counts of replicates for each tissue. Replicate 1 and replicate 2 for each cell-type are shown on the Y and X axes, respectively.



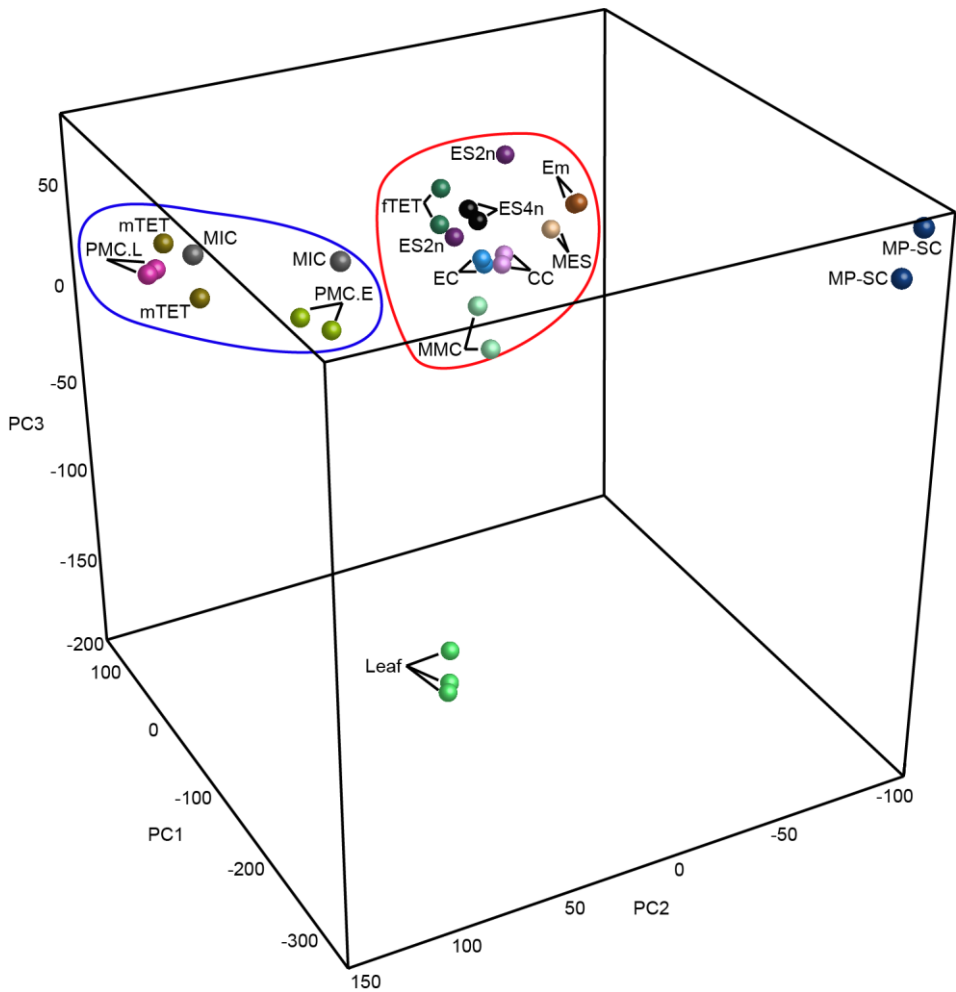

**Supplemental Figure 2.** Principal component analysis (PCA).

PCA plot showing relationships between all transcriptomes.

Abbreviations: MMC, megaspore mother cell; fTET, female tetrads; ES2n, mitotic embryo sac with 2 nuclei; ES4n, embryo sac with 4 nuclei; MES, mature embryo sac at anthesis, containing the egg cell (EC) and central cell (CC); Em, embryo; PMC.E, early pollen mother cell; PMC.L, late pollen mother cell; mTET, male tetrads; MIC, uninucleate microspore; MP-SC, mature pollen-sperm cell.

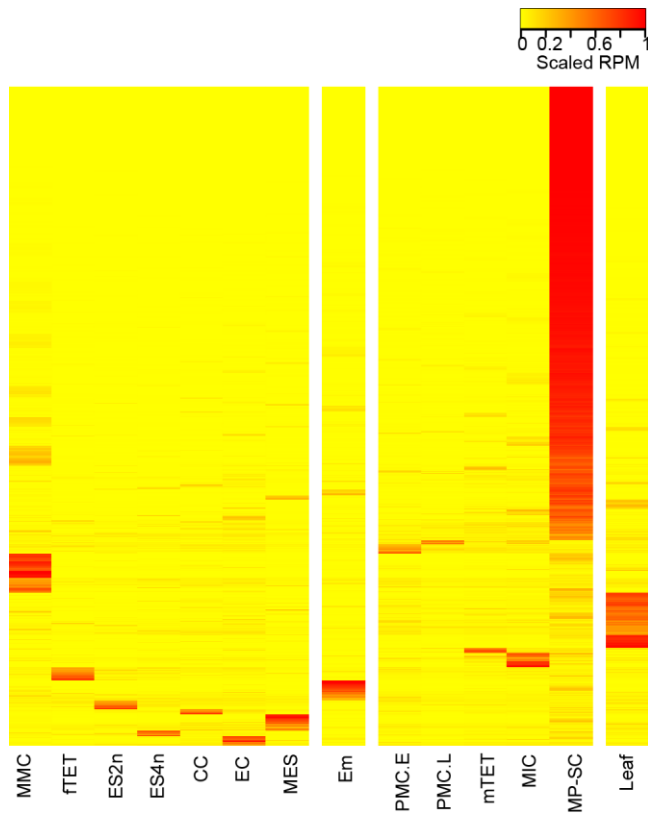

**Supplemental Figure 3.** Cell-specific genes expression.

Heat-map of scaled RPM expression values of the cell-specific genes identified by using the rsgcc software package.

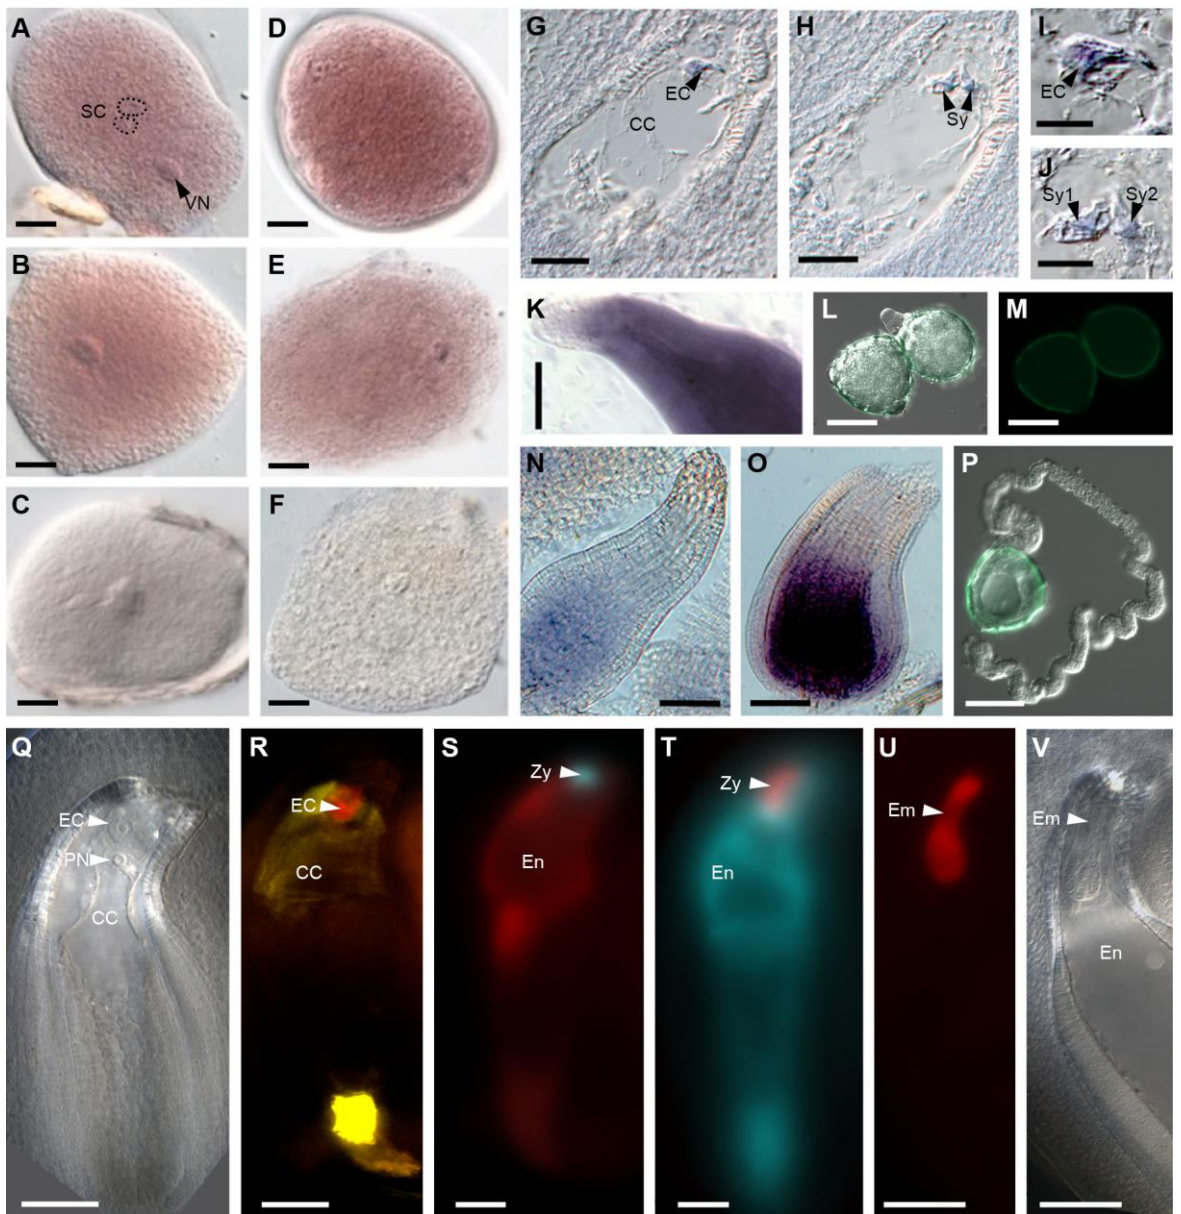

**Supplemental Figure 4.** *In situ* hybridization of cell-specific cowpea genes in gametophytic tissue and fluorescent reporters expressed from *Arabidopsis* cell-specific promoters in cowpea. A-B, *VuXTH32* mRNA localized in the sperm cells and vegetative cell cytoplasm. C, *VuXTH32* sense control. D-E, *VuAt3g09950* mRNA abundantly localized in the sperm and vegetative cells. F, sense *VuAt3g09950* control. G, Paraffin section through a fully differentiated female gametophyte showing *VuEC1.1* mRNA localization in the egg cell. H, Consecutive section to (G) showing *VuEC1.1* mRNA localization in the synergids. I, Detail of G showing mRNA localization in the egg cell. J, Detail of H showing mRNA localization in the synergids. K, Whole-mounted ovule showing *VuMEE23* mRNA localization in the central cell and adjacent nucellar cells. L-M, *AtDUO1<sub>pro</sub>:AcGFP1* no expression. N, Whole-mounted ovule showing *VuSDR1* mRNA localization in the central cell. O, Whole-mounted ovule showing *VuGULL06* mRNA localization confined to the central cell. P, No expression of *AtLAT52<sub>pro</sub>:AcGFP1* in germinating pollen. Q, Mature female gametophyte with egg cell, polar nuclei and central cell in cleared ovule. R, *AtDD45<sub>pro</sub>:dsRED-Express* (red) in EC and general pattern of the *AtDD1<sub>pro</sub>:ZsYellow1* (yellow) in cells external to the embryo sac and in CC. S, *AtEC1.1<sub>pro</sub>:AmCyan1* (cyan) in zygote and *AtDD25<sub>pro</sub>:dsRED-Express* (red) in early endosperm. T, *AtRKD2<sub>pro</sub>:dsRED-Express* (red) in zygote and *AtDD9<sub>pro</sub>:AmCyan1* (cyan) in early endosperm. U, *AtRKD2<sub>pro</sub>:dsRED-Express* in early embryo. *AtDD9* is not expressed at this stage. V, Cleared ovule showing early embryo corresponding to the stage in U.

Scale bars: A-F, I-J = 10  $\mu$ m; G-H = 18  $\mu$ m; K, N-O = 35  $\mu$ m; L-M, P-T = 50  $\mu$ m; U-V = 100  $\mu$ m  
 Abbreviations: EC, egg cell; CC, central cell; Sy, synergids; SC, sperm cells; VN, vegetative nucleus; PN, polar nuclei; Em, embryo; En, endosperm; Zy, zygote.

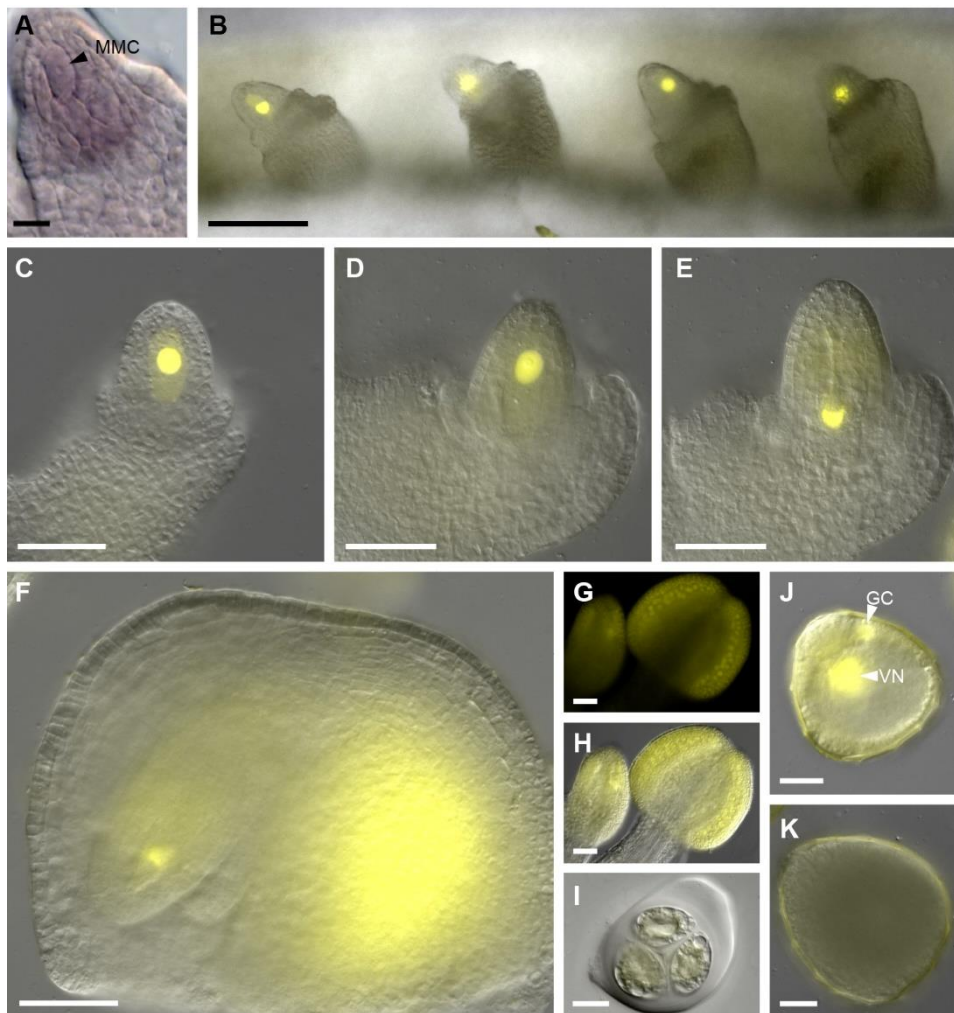

**Supplemental Figure 5.** Expression of the *KNU* genes in cowpea.

A, Whole-mount pre-meiotic ovule showing *VuKNU1* mRNA localized in the MMC and the developing nucellus at the onset of integument initiation. B-D, Micrographs of cowpea ovules expressing a *AtKNU<sub>pro</sub>:nlsYFP* reporter construct marking MMC fate. E-F, At the end of meiosis *KNU* promoter turns off in female functional megaspore, but the expression persists in somatic ovule cells at the chalazal end. G-H, Expression of *AtKNU<sub>pro</sub>:nlsYFP* reporter construct during male meiosis. I, Male tetrad showing no expression of reporter construct. J, After the first pollen mitosis, the expression of reporter construct is evident in both vegetative and generative nuclei. K, Mature pollen grain does not show any expression.

Abbreviations: MMC, megaspore mother cell; GC, generative cell; VN, vegetative nucleus. Scale bars: A = 10  $\mu$ m; B = 100  $\mu$ m; C-H = 50  $\mu$ m; I-K = 20  $\mu$ m.

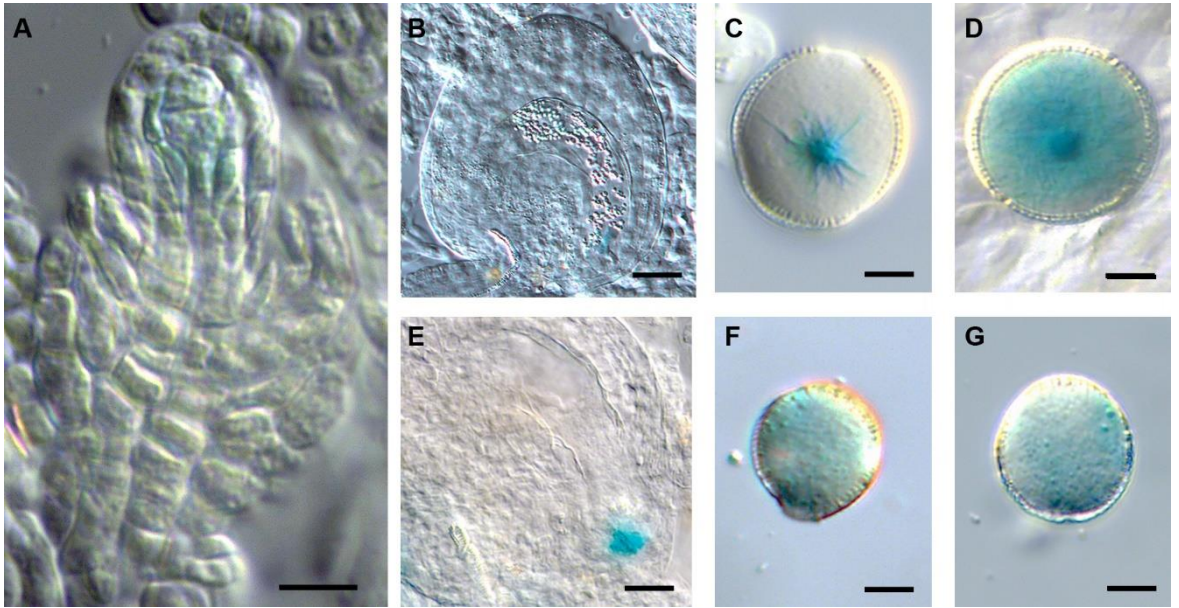

**Supplemental Figure 6.** Specific activity of cowpea promoters in reproductive cells of *Arabidopsis thaliana*.

A, *VuKNU-L1<sub>pro</sub>:GUS* expression in the developing ovule of *Arabidopsis*. B, *VuRKD1<sub>pro</sub>:GUS* expression in the egg cell. C, *VuRKD1<sub>pro</sub>:GUS* expression in a sperm cell. D, *VuRKD1<sub>pro</sub>:GUS* expression in the vegetative cell. E, *VuGULL06<sub>pro</sub>:GUS* in the egg apparatus. F, *VuXTH32<sub>pro</sub>:GUS* expression in the vegetative cell. G, *VuGIM2<sub>pro</sub>:GUS* expression in the vegetative cell. Scale Bars: A, F and G = 10 μm; B and E = 20 μm; C and D = 8 μm.

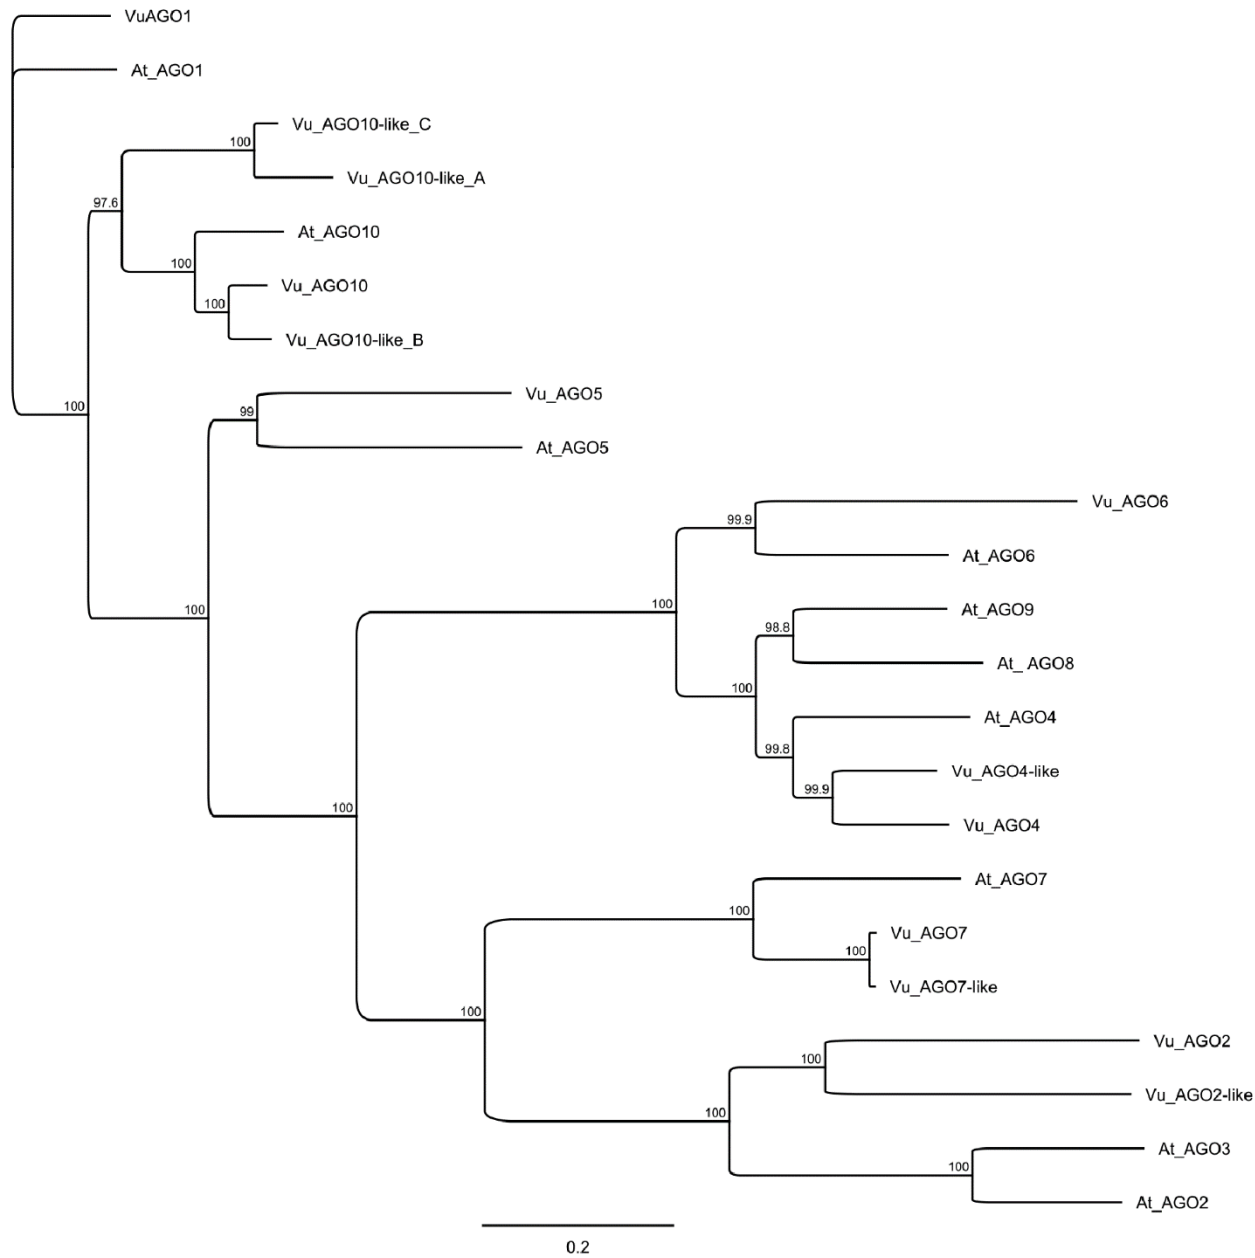

**Supplemental Figure 7.** Phylogeny of the AGO family in cowpea and *Arabidopsis*.

A Jukes-Cantor Neighbour-Joining consensus tree showing the relationship between the AGO genes identified in cowpea (Vu) and those known in *Arabidopsis* (At).

Parameters for tree building were ClustalW MSA with BLOSUM cost matrix, Gap open cost 10, Gap extend cost 0.1. Jukes-Cantor Neighbour-Joining consensus tree, no outgroup, Bootstrap resampling with 1000 replicates, 50% support threshold.
